# Supplementary material for: Combination of Hydrogen and Halogen Bonds in the Crystal Structures of 5-Halogeno-1H-isatin-3-oximes: Involvement of the Oxime Functionality in Halogen Bonding
Source: MDPI journal article supplement (doi:10.3390/molecules29051174), 2024-03-06
Supplement: s1 [file s1]

## Supporting Information

### Combination of hydrogen and halogen bonds in the crystal structures of 5-halogeno-1*H*-isatin-3-oximes: Involvement of the oxime functionality in halogen bonding

Eric Meier, Wilhelm Seichter and Monika Mazik\*

Institut für Organische Chemie, Technische Universität Bergakademie Freiberg, Leipziger Straße 29, 09596

Freiberg, Germany, Tel.: 03731392389; Fax: 03731393170

e-mail: monika.mazik@chemie.tu-freiberg.de; <https://tu-freiberg.de/fakultaet2/orgch>

- Crystallographic and structure refinement data of the crystal structures **1**-(I), **2**-(I), **3**-(I), **3**-(II), **4**-(I), **4**-(II), **4**-(III) and **4**-(IV) (**Table S1**).
- Geometric parameters for noncovalent interactions in the crystal structures examined (**Table S2**).
- Results of crystallization experiments depending on the employed solvent(s) (**Tables S3** and **S4**).
- Search in the Cambridge Structural Database (CSD): NOH<sub>oxime</sub>...X hydrogen bonds (X = F, Cl, Br, I) (**Figure S1**).
- Comparison of the packing behaviors of polymorphs **4**-(III) and **4**-(IV) (**Figure S2**).
- 2D fingerprint plots for overall and individual interactions in the crystal packing of compounds **1**-**4** (**Figures S3-S14**).
- Hirshfeld surface plots of the crystal phases of compounds **3** and **4** (**Figures S15-S20**).
- Calculated electrostatic potential for compounds **1** – **4** mapped on the respective Hirshfeld surfaces (**Figure 21**).
- Overview of hydrogen and halogen bonding patterns in the crystal structures **1**-(I), **2**-(I), **3**-(I), **3**-(II) and **4**-(I) – **4**-(IV) (**Figure S22**).
- <sup>1</sup>H and <sup>13</sup>C NMR spectra of compounds **1**-**4** (**Figures S23-S30**).
- Synthetic procedures for **1**-**3** (further details)
- References

**Table S1:** Crystallographic and structure refinement data of the crystal structures **1**-(I), **2**-(I), **3**-(I) **3**-(II), **4**-(I), **4**-(II), **4**-(III) and **4**-(IV).

| Crystal structure                                                                      | <b>1</b> -(I)                                               | <b>2</b> -(I)                                                 | <b>3</b> -(I)                                                 |
|----------------------------------------------------------------------------------------|-------------------------------------------------------------|---------------------------------------------------------------|---------------------------------------------------------------|
| Empirical formula                                                                      | C <sub>8</sub> H <sub>6</sub> N <sub>2</sub> O <sub>2</sub> | C <sub>8</sub> H <sub>5</sub> ClN <sub>2</sub> O <sub>2</sub> | C <sub>8</sub> H <sub>5</sub> BrN <sub>2</sub> O <sub>2</sub> |
| Formula weight                                                                         | 162.15                                                      | 196.59                                                        | 241.05                                                        |
| Crystal system                                                                         | monoclinic                                                  | monoclinic                                                    | monoclinic                                                    |
| Space group                                                                            | <i>P</i> 2 <sub>1</sub>                                     | <i>P</i> 2 <sub>1</sub> / <i>c</i>                            | <i>P</i> 2 <sub>1</sub> / <i>n</i>                            |
| <i>a</i> (Å)                                                                           | 3.8808(7)                                                   | 7.3643(4)                                                     | 3.7915(4)                                                     |
| <i>b</i> (Å)                                                                           | 10.3169(11)                                                 | 7.5180(3)                                                     | 25.324(3)                                                     |
| <i>c</i> (Å)                                                                           | 9.1690(15)                                                  | 14.2546(7)                                                    | 8.5580(8)                                                     |
| $\alpha$ (°)                                                                           | 90                                                          | 90                                                            | 90                                                            |
| $\beta$ (°)                                                                            | 93.516(14)                                                  | 93.934(4)                                                     | 100.659(8)                                                    |
| $\gamma$ (°)                                                                           | 90                                                          | 90                                                            | 90                                                            |
| <i>V</i> (Å <sup>3</sup> )                                                             | 366.42(10)                                                  | 787.34(7)                                                     | 807.53(15)                                                    |
| <i>Z</i>                                                                               | 2                                                           | 4                                                             | 4                                                             |
| <i>F</i> (000)                                                                         | 168                                                         | 400                                                           | 472                                                           |
| <i>D</i> <sub>c</sub> (Mg m <sup>-3</sup> )                                            | 1.470                                                       | 1.658                                                         | 1.983                                                         |
| $\mu$ (mm <sup>-1</sup> )                                                              | 0.109                                                       | 0.446                                                         | 5.052                                                         |
| Data collection                                                                        |                                                             |                                                               |                                                               |
| Temperature (K)                                                                        | 160(2)                                                      | 160(2)                                                        | 160(2)                                                        |
| No. of collected reflections                                                           | 8106                                                        | 7980                                                          | 4389                                                          |
| within the $\theta$ -limit (°)                                                         | 3.0 – 27.0                                                  | 2.8 – 27.0                                                    | 2.9 – 26.0                                                    |
| Index ranges $\pm h, \pm k, \pm l$                                                     | -4/4, -13/13, -11/11                                        | -9/9, -9/9, -16/18                                            | -4/3, -31/31, -10/10                                          |
| No. of unique reflections                                                              | 834 <sup>b</sup>                                            | 1723                                                          | 1589                                                          |
| <i>R</i> <sub>int</sub>                                                                | 0.0344 <sup>b</sup>                                         | 0.0400                                                        | 0.1043                                                        |
| Refinement calculations: full-matrix least-squares on all <i>F</i> <sup>2</sup> values |                                                             |                                                               |                                                               |
| Weighting expression <i>w</i> <sup>a</sup>                                             | $[\sigma^2(F_o^2) + (0.0396P)^2 + 0.1101P]^{-1}$            | $[\sigma^2(F_o^2) + (0.0568P)^2 + 0.5054P]^{-1}$              | $[\sigma^2(F_o^2) + (0.1053P)^2 + 1.6475P]^{-1}$              |
| No. of refined parameters                                                              | 118                                                         | 127                                                           | 126                                                           |
| No. of restraints                                                                      | 2                                                           | 0                                                             | 2                                                             |
| No. of <i>F</i> values used [ <i>I</i> > 2σ( <i>I</i> )]                               | 823 <sup>b</sup>                                            | 1441                                                          | 944                                                           |
| Final <i>R</i> -Indices                                                                |                                                             |                                                               |                                                               |
| <i>R</i> (=Σ Δ <i>F</i>   / Σ  <i>F</i> <sub>o</sub>  )                                | 0.0374                                                      | 0.0377                                                        | 0.0726                                                        |
| <i>wR</i> on <i>F</i> <sup>2</sup>                                                     | 0.0901                                                      | 0.0947                                                        | 0.1712                                                        |
| <i>S</i> (=Goodness of fit on <i>F</i> <sup>2</sup> )                                  | 1.044                                                       | 1.055                                                         | 1.094                                                         |
| Final Δρ <sub>max</sub> /Δρ <sub>min</sub> (e Å <sup>-3</sup> )                        | 0.17/-0.17                                                  | 0.33/-0.28                                                    | 1.76/-0.88                                                    |

<sup>a</sup>  $P = (F_o^2 + 2F_c^2)/3$ ; <sup>b</sup> The refinement of twinned structure data with SHELXL-2014/7 [1] does not merge symmetry-equivalent reflexes, precluding a direct determination of *R*<sub>int</sub> or the number of measured/unique reflections. An estimate of *R*<sub>int</sub> is available through the measuring programs X-Area/LANA [2,3], while the latter data was taken from the fcf-report of the checkcif routine [4].

**Table S1:** Continued

| Crystal structure                                                                      | <b>3-(II)</b>                                                 | <b>4-(I)</b>                                                 | <b>4-(II)</b>                                                |
|----------------------------------------------------------------------------------------|---------------------------------------------------------------|--------------------------------------------------------------|--------------------------------------------------------------|
| Empirical formula                                                                      | C <sub>8</sub> H <sub>5</sub> BrN <sub>2</sub> O <sub>2</sub> | C <sub>8</sub> H <sub>5</sub> IN <sub>2</sub> O <sub>2</sub> | C <sub>8</sub> H <sub>5</sub> IN <sub>2</sub> O <sub>2</sub> |
| Formula weight                                                                         | 241.05                                                        | 288.04                                                       | 288.04                                                       |
| Crystal system                                                                         | monoclinic                                                    | monoclinic                                                   | monoclinic                                                   |
| Space group                                                                            | <i>P</i> 2 <sub>1</sub> / <i>c</i>                            | <i>C</i> 2/ <i>c</i>                                         | <i>C</i> 2/ <i>c</i>                                         |
| <i>a</i> (Å)                                                                           | 24.0256(17)                                                   | 14.0527(5)                                                   | 10.6756(9)                                                   |
| <i>b</i> (Å)                                                                           | 3.8070(2)                                                     | 10.1160(2)                                                   | 10.1072(6)                                                   |
| <i>c</i> (Å)                                                                           | 17.7962(13)                                                   | 25.0788(9)                                                   | 16.1947(14)                                                  |
| $\alpha$ (°)                                                                           | 90                                                            | 90                                                           | 90                                                           |
| $\beta$ (°)                                                                            | 95.208(6)                                                     | 102.934(3)                                                   | 93.753(7)                                                    |
| $\gamma$ (°)                                                                           | 90                                                            | 90                                                           | 90                                                           |
| <i>V</i> (Å <sup>3</sup> )                                                             | 1621.02(19)                                                   | 3474.68(19)                                                  | 1743.7(2)                                                    |
| <i>Z</i>                                                                               | 8                                                             | 16                                                           | 8                                                            |
| <i>F</i> (000)                                                                         | 944                                                           | 2176                                                         | 1088                                                         |
| <i>D</i> <sub>c</sub> (Mg m <sup>-3</sup> )                                            | 1.975                                                         | 2.202                                                        | 2.194                                                        |
| $\mu$ (mm <sup>-1</sup> )                                                              | 5.034                                                         | 3.651                                                        | 3.638                                                        |
| Data collection                                                                        |                                                               |                                                              |                                                              |
| Temperature (K)                                                                        | 160(2)                                                        | 160(2)                                                       | 160(2)                                                       |
| No. of collected reflections                                                           | 19953                                                         | 14389                                                        | 8091                                                         |
| within the $\theta$ -limit (°)                                                         | 2.7 – 27.0                                                    | 1.7 – 25.5                                                   | 2.8 – 27.9                                                   |
| Index ranges $\pm h, \pm k, \pm l$                                                     | -30/30, -4/4, -22/22                                          | -14/16, -12/12, -30/30                                       | -14/14, -13/13, -17/21                                       |
| No. of unique reflections                                                              | 3514                                                          | 3240                                                         | 2080                                                         |
| <i>R</i> <sub>int</sub>                                                                | 0.0461                                                        | 0.0384                                                       | 0.0208                                                       |
| Refinement calculations: full-matrix least-squares on all <i>F</i> <sup>2</sup> values |                                                               |                                                              |                                                              |
| Weighting expression <i>w</i> <sup>a</sup>                                             | $[\sigma^2(F_o^2) + (0.0227P)^2 + 3.4596P]^{-1}$              | $[\sigma^2(F_o^2) + (0.0580P)^2 + 5.4500P]^{-1}$             | $[\sigma^2(F_o^2) + (0.0189P)^2 + 2.5567P]^{-1}$             |
| No. of refined parameters                                                              | 251                                                           | 251                                                          | 126                                                          |
| No. of restraints                                                                      | 0                                                             | 2                                                            | 0                                                            |
| No. of <i>F</i> values used [ <i>I</i> > 2σ( <i>I</i> )]                               | 2907                                                          | 2873                                                         | 1937                                                         |
| Final <i>R</i> -Indices                                                                |                                                               |                                                              |                                                              |
| <i>R</i> (=Σ Δ <i>F</i>   / Σ  <i>F</i> <sub>o</sub>  )                                | 0.0301                                                        | 0.0335                                                       | 0.0155                                                       |
| <i>wR</i> on <i>F</i> <sup>2</sup>                                                     | 0.0651                                                        | 0.0845                                                       | 0.0379                                                       |
| <i>S</i> (=Goodness of fit on <i>F</i> <sup>2</sup> )                                  | 1.151                                                         | 1.093                                                        | 1.083                                                        |
| Final Δρ <sub>max</sub> /Δρ <sub>min</sub> (e Å <sup>-3</sup> )                        | 0.70/-0.61                                                    | 0.50/-1.14                                                   | 0.39/-0.33                                                   |

<sup>a</sup>  $P = (F_o^2 + 2F_c^2)/3$

**Table S1:** Continued

| Crystal structure                                                                      | <b>4</b> -(III)                                              | <b>4</b> -(IV) <sup>b</sup>                                  |
|----------------------------------------------------------------------------------------|--------------------------------------------------------------|--------------------------------------------------------------|
| Empirical formula                                                                      | C <sub>8</sub> H <sub>5</sub> IN <sub>2</sub> O <sub>2</sub> | C <sub>8</sub> H <sub>5</sub> IN <sub>2</sub> O <sub>2</sub> |
| Formula weight                                                                         | 288.04                                                       | 288.04                                                       |
| Crystal system                                                                         | monoclinic                                                   | monoclinic                                                   |
| Space group                                                                            | <i>C</i> 2/ <i>c</i>                                         | <i>C</i> 2/ <i>c</i>                                         |
| <i>a</i> (Å)                                                                           | 19.9997(7)                                                   | 47.127(4)                                                    |
| <i>b</i> (Å)                                                                           | 4.4355(1)                                                    | 4.0991(2)                                                    |
| <i>c</i> (Å)                                                                           | 39.5075(14)                                                  | 18.6214(14)                                                  |
| $\alpha$ (°)                                                                           | 90                                                           | 90                                                           |
| $\beta$ (°)                                                                            | 99.133(3)                                                    | 105.676(6)                                                   |
| $\gamma$ (°)                                                                           | 90                                                           | 90                                                           |
| <i>V</i> (Å <sup>3</sup> )                                                             | 3460.23(19)                                                  | 3463.4(4)                                                    |
| <i>Z</i>                                                                               | 16                                                           | 16                                                           |
| <i>F</i> (000)                                                                         | 2176                                                         | 2176                                                         |
| <i>D</i> <sub>c</sub> (Mg m <sup>-3</sup> )                                            | 2.212                                                        | 2.210                                                        |
| $\mu$ (mm <sup>-1</sup> )                                                              | 3.666                                                        | 3.663                                                        |
| Data collection                                                                        |                                                              |                                                              |
| Temperature (K)                                                                        | 160(2)                                                       | 160(2)                                                       |
| No. of collected reflections                                                           | 13209                                                        | 11976                                                        |
| within the $\theta$ -limit (°)                                                         | 2.1 – 26.0                                                   | 2.7 – 26.0                                                   |
| Index ranges $\pm h, \pm k, \pm l$                                                     | -24/24, -4/5, -48/48                                         | -53/58, -5/5, -22/22                                         |
| No. of unique reflections                                                              | 3406                                                         | 3369                                                         |
| <i>R</i> <sub>int</sub>                                                                | 0.0378                                                       | 0.1212                                                       |
| Refinement calculations: full-matrix least-squares on all <i>F</i> <sup>2</sup> values |                                                              |                                                              |
| Weighting expression <i>w</i> <sup>a</sup>                                             | $[\sigma^2(F_o^2) + (0.0537P)^2 + 6.7024P]^{-1}$             | $[\sigma^2(F_o^2) + (0.1275P)^2 + 0.0000P]^{-1}$             |
| No. of refined parameters                                                              | 252                                                          | 248                                                          |
| No. of restraints                                                                      | 0                                                            | 4                                                            |
| No. of <i>F</i> values used [ <i>I</i> > 2σ( <i>I</i> )]                               | 3146                                                         | 1899                                                         |
| Final <i>R</i> -Indices                                                                |                                                              |                                                              |
| <i>R</i> (=Σ Δ <i>F</i>   / Σ  <i>F</i> <sub>o</sub>  )                                | 0.0293                                                       | 0.0664                                                       |
| <i>wR</i> on <i>F</i> <sup>2</sup>                                                     | 0.0761                                                       | 0.1683                                                       |
| <i>S</i> (=Goodness of fit on <i>F</i> <sup>2</sup> )                                  | 1.074                                                        | 0.949                                                        |
| Final Δρ <sub>max</sub> /Δρ <sub>min</sub> (e Å <sup>-3</sup> )                        | 1.03/-1.06                                                   | 1.70/-1.50                                                   |

<sup>a</sup>  $P = (F_o^2 + 2F_c^2)/3$ ; <sup>b</sup> the crystals in the sample were small and oftentimes twinned, rendering the collection of an adequate data set difficult.



**Table S2:** Geometric parameters for non-covalent interactions in the crystal structures examined.

| Atoms                   |                          | Distance (Å)  |          | Angle (°) | Slippage (Å) |
|-------------------------|--------------------------|---------------|----------|-----------|--------------|
| D-H...A                 |                          | D...A         | H...A    | D-H...A   |              |
| C-X...A (X=Br, I; A=O)  |                          | C...A         | X...A    | C-X...A   |              |
| $\pi\cdots\pi$          |                          | $Cg\cdots Cg$ |          |           |              |
| <b>1-(I)</b>            |                          |               |          |           |              |
| N(1)-H(1)···N(2)        | -x, -y, -z               | 2.859(4)      | 2.00(5)  | 157(5)    |              |
| O(2)-H(2)···O(1)        | -x, -0.5+y, -z           | 2.712(3)      | 1.76(6)  | 174(5)    |              |
| C(5)-H(5)···O(2)        | x, y, z ( <i>intra</i> ) | 3.063(5)      | 2.59     | 111       |              |
| $Cg(A)\cdots Cg(B)^a$   | -1+x, y, z               | 3.411(2)      |          |           | 0.375        |
| $Cg(B)\cdots Cg(A)^a$   | 1+x, y, z                | 3.411(2)      |          |           | 0.493        |
| $Cg(B)\cdots Cg(B)^a$   | 1+x, y, z                | 3.881(2)      |          |           | 1.831        |
| <b>2-(I)</b>            |                          |               |          |           |              |
| N(1)-H(1)···O(1)        | 1-x, -y, 1-z             | 2.840(2)      | 1.96(3)  | 167(3)    |              |
| O(2)-H(2)···O(1)        | 1-x, 0.5+y, 1.5-z        | 2.712(2)      | 1.86(4)  | 164(3)    |              |
| C(5)-H(5)···O(2)        | x, y, z ( <i>intra</i> ) | 3.028(2)      | 2.56     | 111       |              |
| C(7)-H(7)···Cl(1)       | -x, -0.5+y, 0.5-z        | 3.590(2)      | 2.87     | 134       |              |
| $Cg(A)\cdots Cg(B)^a$   | 1-x, 1-y, 1-z            | 3.613(1)      |          |           | 1.512        |
| $Cg(B)\cdots Cg(A)^a$   | 1-x, 1-y, 1-z            | 3.613(1)      |          |           | 1.510        |
| $Cg(B)\cdots Cg(B)^a$   | -x, 1-y, 1-z             | 3.718(1)      |          |           | 1.555        |
| <b>3-(I)</b>            |                          |               |          |           |              |
| N(1)-H(1)···N(2)        | 0.5+x, 0.5-y, -0.5+z     | 2.827(11)     | 2.02(10) | 153(10)   |              |
| O(2)-H(2)···O(1)        | -0.5+x, 0.5-y, 0.5+z     | 2.772(11)     | 1.94(14) | 172(16)   |              |
| C(5)-H(5)···O(2)        | x, y, z ( <i>intra</i> ) | 3.140(12)     | 2.68     | 111       |              |
| C(5)-H(5)···Br(1)       | 1-x, 1-y, 1-z            | 3.977(11)     | 3.04     | 170       |              |
| $Cg(B)\cdots Cg(B)^a$   | -1+x, y, z               | 3.791(7)      |          |           | 1.669        |
| <b>3-(II)</b>           |                          |               |          |           |              |
| N(1)-H(1)···O(11)       | x, -0.5-y, -0.5+z        | 3.134(3)      | 2.48(5)  | 141(4)    |              |
| N(1)-H(1)···N(12)       | x, -0.5-y, -0.5+z        | 3.030(4)      | 2.34(3)  | 146(5)    |              |
| N(11)-H(11)···N(2)      | x, -1+y, z               | 2.873(4)      | 2.18(4)  | 142(3)    |              |
| N(11)-H(11)···O(1)      | x, y, z                  | 3.478(4)      | 2.74(4)  | 150(3)    |              |
| O(2)-H(2)···O(11)       | x, y, z                  | 2.724(3)      | 1.95(5)  | 170(5)    |              |
| O(12)-H(12)···O(1)      | x, 0.5-y, 0.5+z          | 2.701(3)      | 1.87(5)  | 168(5)    |              |
| C(5)-H(5)···O(2)        | x, y, z ( <i>intra</i> ) | 3.152(4)      | 2.70     | 110       |              |
| C(6)-Br(1)···O(2)       | -x, -1-y, 1-z            | 5.038(3)      | 3.183(2) | 164.1(1)  |              |
| C(15)-H(15)···O(12)     | x, y, z ( <i>intra</i> ) | 3.053(4)      | 2.58     | 111       |              |
| C(15)-H(15)···Br(11)    | 1-x, 0.5+y, 1.5-z        | 3.956(3)      | 3.02     | 169       |              |
| C(17)-H(17)···Br(11)    | 1-x, 1-y, 1-z            | 3.748(3)      | 3.05     | 132       |              |
| $Cg(A)\cdots Cg(B)^a$   | x, 1+y, z                | 3.713(2)      |          |           | 1.511        |
| $Cg(B)\cdots Cg(A)^a$   | x, -1+y, z               | 3.713(2)      |          |           | 1.473        |
| $Cg(B)\cdots Cg(B)^a$   | x, 1+y, z                | 3.807(2)      |          |           | 1.704        |
| $Cg(B')\cdots Cg(B')^a$ | x, -1+y, z               | 3.807(2)      |          |           | 1.738        |

<sup>a</sup> Cg means the centroid (centre of gravity) of the ring.**1-(I), 2-(I), 3-(I):** Ring A: N(1), C(2), C(3), C(4), C(9); ring B: C(4)...C(9).**3-(II):** Ring A: N(1), C(2), C(3), C(4), C(9); ring B: C(4)...C(9); ring A': N(11), C(12), C(13), C(14), C(19); ring B': C(14)...C(19).

**Table S2:** Continued.

| Atoms                   |                          | Distance (Å)  |          | Angle (°) | Slippage (Å) |
|-------------------------|--------------------------|---------------|----------|-----------|--------------|
| D-H...A                 |                          | D...A         | H...A    | D-H...A   |              |
| C-X...A (X=Br, I; A=O)  |                          | C...A         | X...A    | C-X...A   |              |
| $\pi\cdots\pi$          |                          | $Cg\cdots Cg$ |          |           |              |
| <b>4-(I)</b>            |                          |               |          |           |              |
| N(1)-H(1)···N(12)       | 0.5-x, 0.5+y, 0.5-z      | 2.866(5)      | 2.23(5)  | 139(5)    |              |
| O(2)-H(2)···O(11)       | 0.5-x, -0.5+y, 0.5-z     | 2.705(4)      | 1.86(5)  | 171(6)    |              |
| N(11)-H(11)···N(2)      | 0.5-x, 0.5+y, 0.5-z      | 2.826(4)      | 2.07(5)  | 146(5)    |              |
| O(12)-H(12)···O(1)      | 0.5-x, -0.5+y, 0.5-z     | 2.771(4)      | 1.96(5)  | 162(7)    |              |
| C(5)-H(5)···O(2)        | x, y, z ( <i>intra</i> ) | 3.054(5)      | 2.58     | 111       |              |
| C(6)-I(1)···I(1)        | 1.5-x, 1.5-y, 1-z        | 5.564(4)      | 3.772(1) | 141.1(1)  |              |
| C(15)-H(15)···O(12)     | x, y, z ( <i>intra</i> ) | 3.092(5)      | 2.63     | 110       |              |
| $Cg(A)\cdots Cg(B)^a$   | 1-x, y, 0.5-z            | 3.499(3)      |          |           | 0.951        |
| $Cg(B)\cdots Cg(A)^a$   | 1-x, y, 0.5-z            | 3.499(3)      |          |           | 0.817        |
| $Cg(B)\cdots Cg(A')^a$  | x, y, z                  | 3.467(3)      |          |           | 0.815        |
| $Cg(B)\cdots Cg(B')^a$  | x, y, z                  | 3.920(2)      |          |           | 1.536        |
| $Cg(A')\cdots Cg(B)^a$  | x, y, z                  | 3.467(3)      |          |           | 0.571        |
| $Cg(B)\cdots Cg(B')^a$  | 0.5-x, 1.5-y, 1-z        | 3.909(2)      |          |           | 1.533        |
| <b>4-(II)</b>           |                          |               |          |           |              |
| N(1)-H(1)···N(2)        | 0.5-x, 0.5+y, 0.5-z      | 2.827(2)      | 2.10(3)  | 147(3)    |              |
| O(2)-H(2)···O(1)        | 0.5-x, -0.5+y, 0.5-z     | 2.757(2)      | 2.03(3)  | 169(3)    |              |
| C(5)-H(5)···O(2)        | x, y, z ( <i>intra</i> ) | 3.081(2)      | 2.61     | 111       |              |
| C(6)-I(1)···I(1)        | 2-x, 1-y, 1-z            | 2.825(5)      | 3.898(1) | 136.8(1)  |              |
| $Cg(A)\cdots Cg(B)^a$   | 1-x, y, 0.5-z            | 3.549(1)      |          |           | 1.225        |
| $Cg(B)\cdots Cg(A)^a$   | 1-x, y, 0.5-z            | 3.549(1)      |          |           | 1.152        |
| $Cg(B)\cdots Cg(B)^a$   | 1-x, 1-y, 1-z            | 3.871(1)      |          |           | 1.422        |
| <b>4-(III)</b>          |                          |               |          |           |              |
| N(1)-H(1)···N(12)       | 0.5+x, -0.5+y, z         | 2.901(4)      | 2.14(5)  | 142(5)    |              |
| O(2)-H(2)···O(11)       | x, y, z                  | 2.704(4)      | 2.01(6)  | 163(5)    |              |
| N(11)-H(11)···N(2)      | x, y, z                  | 2.833(4)      | 2.09(3)  | 146(5)    |              |
| O(12)-H(12)···O(1)      | -0.5+x, 0.5+y, z         | 2.694(4)      | 1.85(6)  | 163(5)    |              |
| C(5)-H(5)···O(2)        | x, y, z ( <i>intra</i> ) | 3.031(4)      | 2.55     | 111       |              |
| C(6)-I(1)···O(2)        | 1-x, 1+y, 0.5-z          | 5.564(4)      | 3.383(2) | 169.4(1)  |              |
| C(15)-H(15)···O(12)     | x, y, z ( <i>intra</i> ) | 3.070(4)      | 2.60     | 111       |              |
| $Cg(A)\cdots Cg(B)^a$   | x, -1+y, z               | 3.630(2)      |          |           | 1.468        |
| $Cg(B)\cdots Cg(A)^a$   | x, 1+y, z                | 3.630(2)      |          |           | 1.380        |
| $Cg(A')\cdots Cg(B')^a$ | x, 1+y, z                | 3.520(2)      |          |           | 0.854        |
| $Cg(B')\cdots Cg(A')^a$ | x, -1+y, z               | 3.520(2)      |          |           | 0.718        |

<sup>a</sup> Cg means the centroid (centre of gravity) of the ring.

**4-(II):** Ring A: N(1), C(2), C(3), C(4), C(9); ring B: C(4)...C(9).

**4-(I), 4-(III):** Ring A: N(1), C(2), C(3), C(4), C(9); ring B: C(4)...C(9); ring A': N(11), C(12), C(13), C(14), C(19); ring B': C(14)...C(19).

**Table S2:** Continued.

| Atoms                   |                            | Distance (Å)  |          | Angle (°) | Slippage (Å) |
|-------------------------|----------------------------|---------------|----------|-----------|--------------|
| D-H...A                 |                            | D...A         | H...A    | D-H...A   |              |
| C-X...A (X=Br, I; A=O)  |                            | C...A         | X...A    | C-X...A   |              |
| $\pi\cdots\pi$          |                            | $Cg\cdots Cg$ |          |           |              |
| <b>4-(IV)</b>           |                            |               |          |           |              |
| N(1)-H(1)⋯N(12)         | $x, 1-y, -0.5+z$           | 3.081(17)     | 2.55(14) | 120(12)   |              |
| N(1)-H(1)⋯O(11)         | $x, 1-y, -0.5+z$           | 3.205(14)     | 2.41(5)  | 151(11)   |              |
| N(11)-H(11)⋯N(2)        | $x, y, z$                  | 2.859(19)     | 2.03(14) | 158(14)   |              |
| O(2)-H(2)⋯O(11)         | $x, y, z$                  | 2.758(13)     | 2.01(18) | 148(17)   |              |
| O(12)-H(12)⋯O(1)        | $x, -y, 0.5+z$             | 2.665(13)     | 1.84(8)  | 167(16)   |              |
| C(5)-H(5)⋯O(2)          | $x, y, z$ ( <i>intra</i> ) | 3.175(16)     | 2.74     | 109       |              |
| C(6)-I(1)⋯O(2)          | $1-x, 1+y, 1.5-z$          | 5.390(14)     | 3.287(9) | 173.4(4)  |              |
| C(15)-H(15)⋯O(12)       | $x, y, z$ ( <i>intra</i> ) | 3.053(16)     | 2.58     | 111       |              |
| C(16)-I(11)⋯O(12)       | $0.5-x, -0.5+y, 1.5-z$     | 5.353(14)     | 3.285(9) | 168.8(4)  |              |
| $Cg(A)\cdots Cg(B)^a$   | $x, -1+y, z$               | 3.575(8)      |          |           | 0.803        |
| $Cg(B)\cdots Cg(A)^a$   | $x, 1+y, z$                | 3.576(8)      |          |           | 0.851        |
| $Cg(A')\cdots Cg(B')^a$ | $x, 1+y, z$                | 3.811(8)      |          |           | 1.623        |
| $Cg(B')\cdots Cg(A')^a$ | $x, -1+y, z$               | 3.811(8)      |          |           | 1.570        |

<sup>a</sup> Cg means the centroid (centre of gravity) of the ring.

**4-(IV):** Ring A: N(1), C(2), C(3), C(4), C(9); ring B: C(4)...C(9); ring A': N(11), C(12), C(13), C(14), C(19); ring B': C(14)...C(19).

**Table S3:** Solvents used for crystallization experiments

| Solvents tested for crystallization experiments |                               |
|-------------------------------------------------|-------------------------------|
| <i>n</i> -Hexane                                | 1,4-Dioxane                   |
| <i>n</i> -Hexane/Acetone                        | Acetone                       |
| <i>n</i> -Heptane                               | Ethyl acetate                 |
| <i>n</i> -Heptane/Ethyl acetate                 | Dimethyl carbonate            |
| Toluene                                         | <i>N,N</i> -Dimethylformamide |
| Pyridine                                        | Dimethylsulfoxide             |
| Dichloromethane                                 | Acetonitrile                  |
| Chloroform                                      | <i>n</i> -Butanol             |
| Diethyl ether                                   | <i>iso</i> -Propanol          |
| Diisopropyl ether                               | Ethanol                       |
| 1,2-Dimethoxyethane                             | Methanol                      |
| 2,2-Dimethoxypropane                            | Water                         |
| Tetrahydrofuran                                 | Water/Tetrahydrofuran         |

**Table S4:** Results of crystallization experiments depending on the employed solvent(s).

| solvent                         | 1 <i>H</i> -Isatin-3-oxime | 5-Chloroisatin-3-oxime | 5-Bromoisatin-3-oxime         | 5-Iodoisatin-3-oxime                        |
|---------------------------------|----------------------------|------------------------|-------------------------------|---------------------------------------------|
| <i>n</i> -Hexane/Acetone        | -                          | <b>2</b> -(I)          | -                             | <b>4</b> -(I)                               |
| <i>n</i> -Heptane/Ethyl acetate | -                          | -                      | <b>3</b> -(II)                | <b>4</b> -(I)                               |
| Pyridine                        | -                          | <b>2</b> -(I)          | -                             | -                                           |
| 1,2-Dimethoxyethane             | <b>1</b> -(I)              | <b>2</b> -(I)          | <b>3</b> -(I)/ <b>3</b> -(II) | -                                           |
| Tetrahydrofuran                 | -                          | <b>2</b> -(I)          | -                             | <b>4</b> -(I)/ <b>4</b> -(IV) <sup>a</sup>  |
| 1,4-Dioxane                     | <b>1</b> -(I)              | <b>2</b> -(I)          | -                             | <b>4</b> -(I)                               |
| Acetone                         | -                          | <b>2</b> -(I)          | -                             | <b>4</b> -(I)                               |
| Ethyl acetate                   | -                          | -                      | -                             | <b>4</b> -(I)                               |
| <i>N,N</i> -Dimethylformamide   | -                          | <b>2</b> -(I)          | <b>3</b> -(II)                | -                                           |
| Dimethylsulfoxide               | <b>1</b> -(I)              | <b>2</b> -(I)          | <b>3</b> -(II)                | <b>4</b> -(I)                               |
| Acetonitrile                    | -                          | -                      | -                             | <b>4</b> -(I)                               |
| <i>n</i> -Butanol               | -                          | <b>2</b> -(I)          | -                             | -                                           |
| <i>iso</i> -Propanol            | -                          | <b>2</b> -(I)          | -                             | <b>4</b> -(I)                               |
| Ethanol                         | <b>1</b> -(I)              | <b>2</b> -(I)          | -                             | <b>4</b> -(I)/ <b>4</b> -(II)               |
| Methanol                        | -                          | <b>2</b> -(I)          | <b>3</b> -(II)                | <b>4</b> -(I)/ <b>4</b> -(II)               |
| Water                           | <b>1</b> -(I)              | X                      | X                             | X <sup>c</sup>                              |
| Water/Tetrahydrofuran           | -                          | <b>2</b> -(I)          | -                             | <b>4</b> -(I)/ <b>4</b> -(III) <sup>b</sup> |

<sup>a</sup> **4**-(IV) could only be obtained a single time. All following experiments in THF yielded **4**-(I). <sup>b</sup> Recrystallization of the iodinated compound from H<sub>2</sub>O/THF resulted in **4**-(I), while slowly evaporating a respective solution yielded **4**-(III). <sup>c</sup> "X" marks instances where the solubility of the compound was too low for an adequate experiment.

### Search in the Cambridge Structural Database (CSD): $\text{NOH}_{\text{oxime}} \cdots \text{X}$ hydrogen bonds ( $\text{X} = \text{F}, \text{Cl}, \text{Br}, \text{I}$ ) (Figure S1)

In order to determine the prevalence and nature of hydrogen bonding between oxime and halogen substituents in the Cambridge Structural Database (CSD), the interaction was modeled as follows:  $(\text{NM})_2\text{C}=\text{NOH} \cdots \text{X}-\text{NM}$ , where NM is any non-metal, X is any halogen, and the hydrogen bond geometry was restrained to distances shorter than the sum of the van der Waals radii as well as angles of  $\angle(\text{O}-\text{H} \cdots \text{X})$  greater than  $110^\circ$ .

The search revealed that in the overwhelming majority of cases, neutral halogen atoms do not function as primary acceptors of oxime-based hydrogen bonds. Instead, the  $\text{NOH} \cdots \text{X}$  contacts can be interpreted as secondary interactions resulting from bifurcated hydrogen bonds to more potent primary acceptors. On one hand, the latter can be the oxime groups themselves, leading to the dimeric arrangements represented in Figure S1a. On the other hand, various different lewis-basic centers (denoted Y in Figure S1b) can fill the role of the primary hydrogen bond acceptor, predominantly giving rise to supramolecular dimers or 0-dimensional structures. An additional observation pertains to the identity of the halogen, which is oftentimes occupied by an F atom, while  $\text{NOH} \cdots \text{Cl}/\text{Br}$  contacts occur significantly less often and I atoms are virtually never involved.

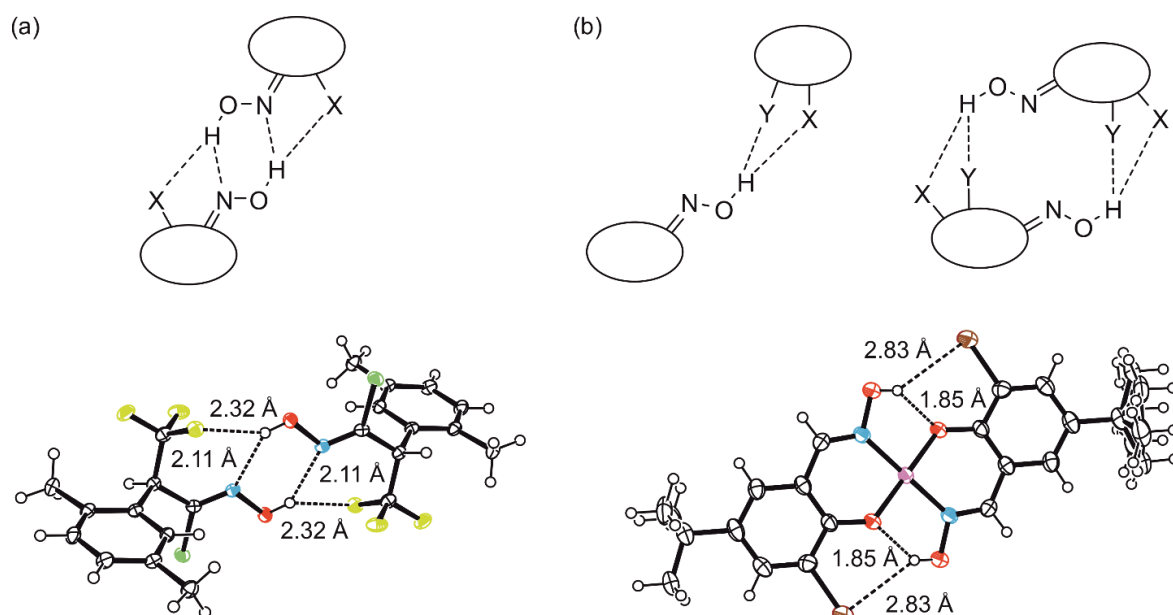

**Figure S1.** Common geometries of  $\text{NOH} \cdots \text{X}$  bonds in the CSD ( $\text{X} = \text{F}, \text{Cl}, \text{Br}, \text{I}$ ). Color scheme: hydrogen = white (circles) carbon = white (ellipsoids), nitrogen = blue, oxygen = red, fluorine = yellow, chlorine = green, bromine = brown, nickel = pink. (a) Dimeric arrangement centered around an  $\text{R}_2^2(6)$  oxime motif with secondary  $\text{NOH} \cdots \text{X}$  contacts. An example can be found in the structure KIGHIU [5]. (b) 0-dimensional or dimeric structures resulting from bifurcated hydrogen bonds from the oxime moiety to another primary acceptor (Y) and the halogen (X). As an example, an excerpt of the structure DUJHIB [6] is shown.

## Comparison of the packing behaviors of polymorphs 4-(III) and 4-(IV) (Figure S2)

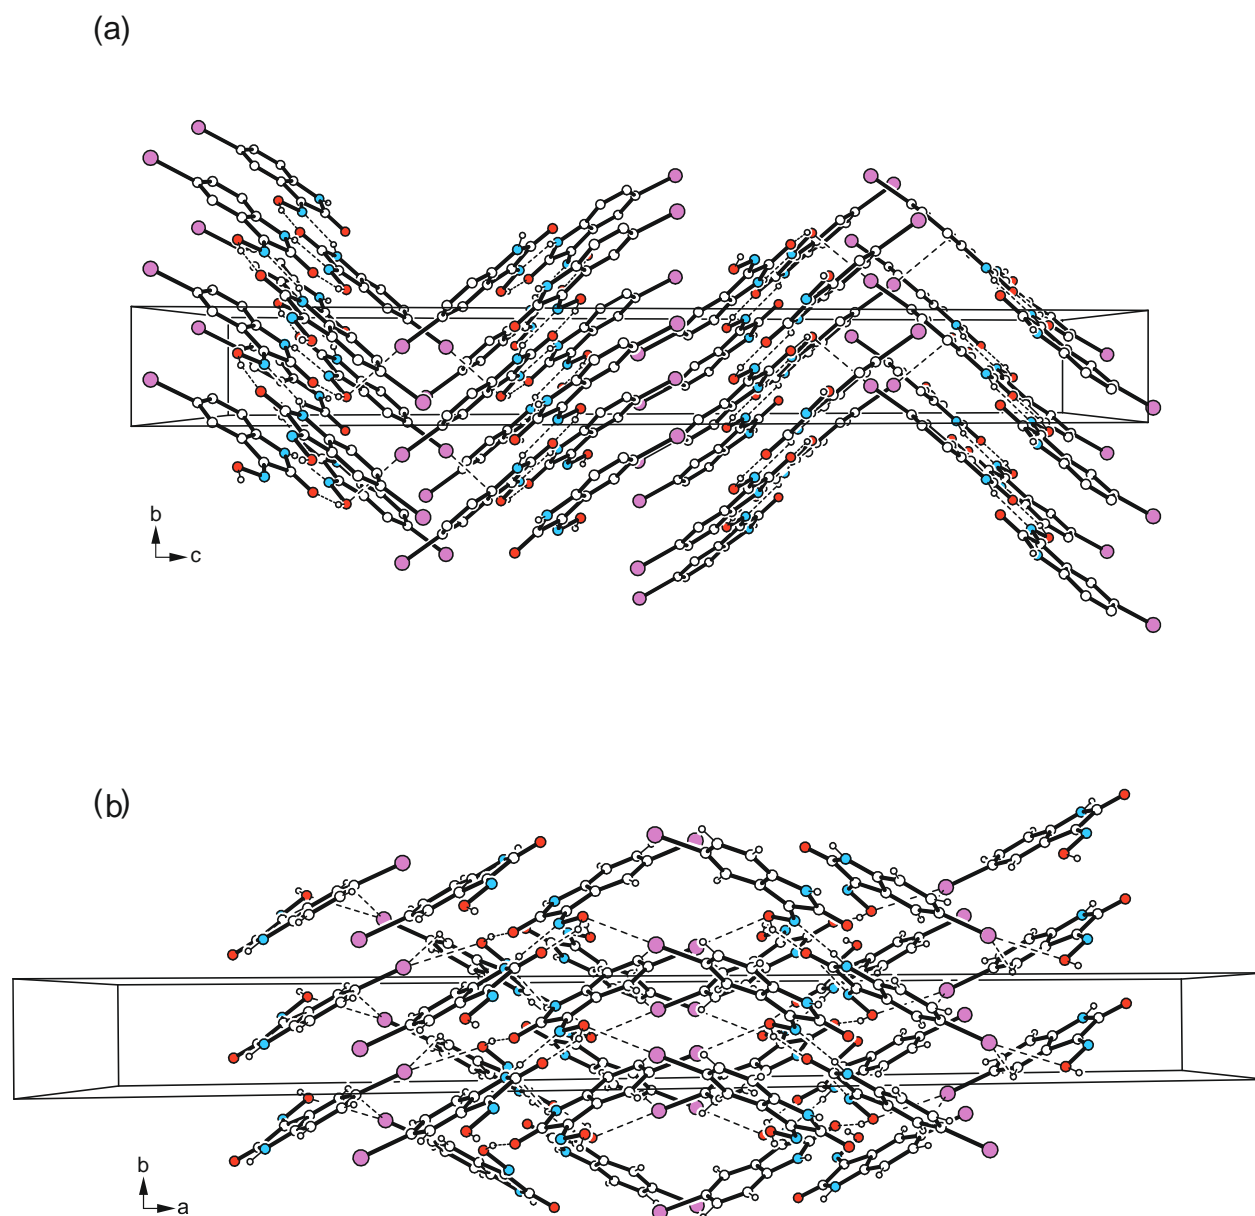

**Figure S2.** Packing diagrams of (a) the polymorph 4-(III) viewed in direction of the *a*-axis and (b) of polymorph 4-(IV) viewed along the *c*-axis.

**2D fingerprint plots for overall and individual interactions in the crystal packing of compounds 1-4 (Figures S3-S14)**

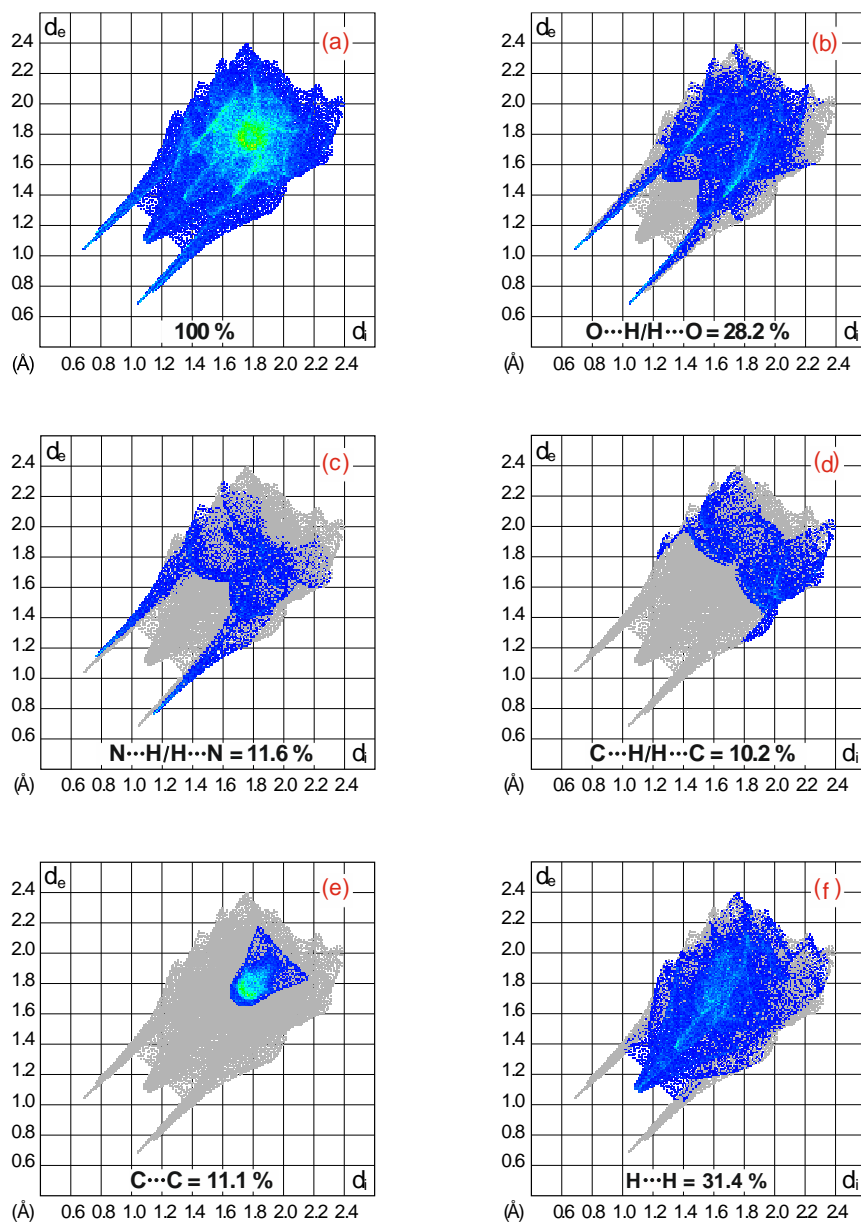

**Figure S3.** 2D fingerprint plots for (a) overall interactions and (b-f) individual interactions in the crystal packing of **1-I**.

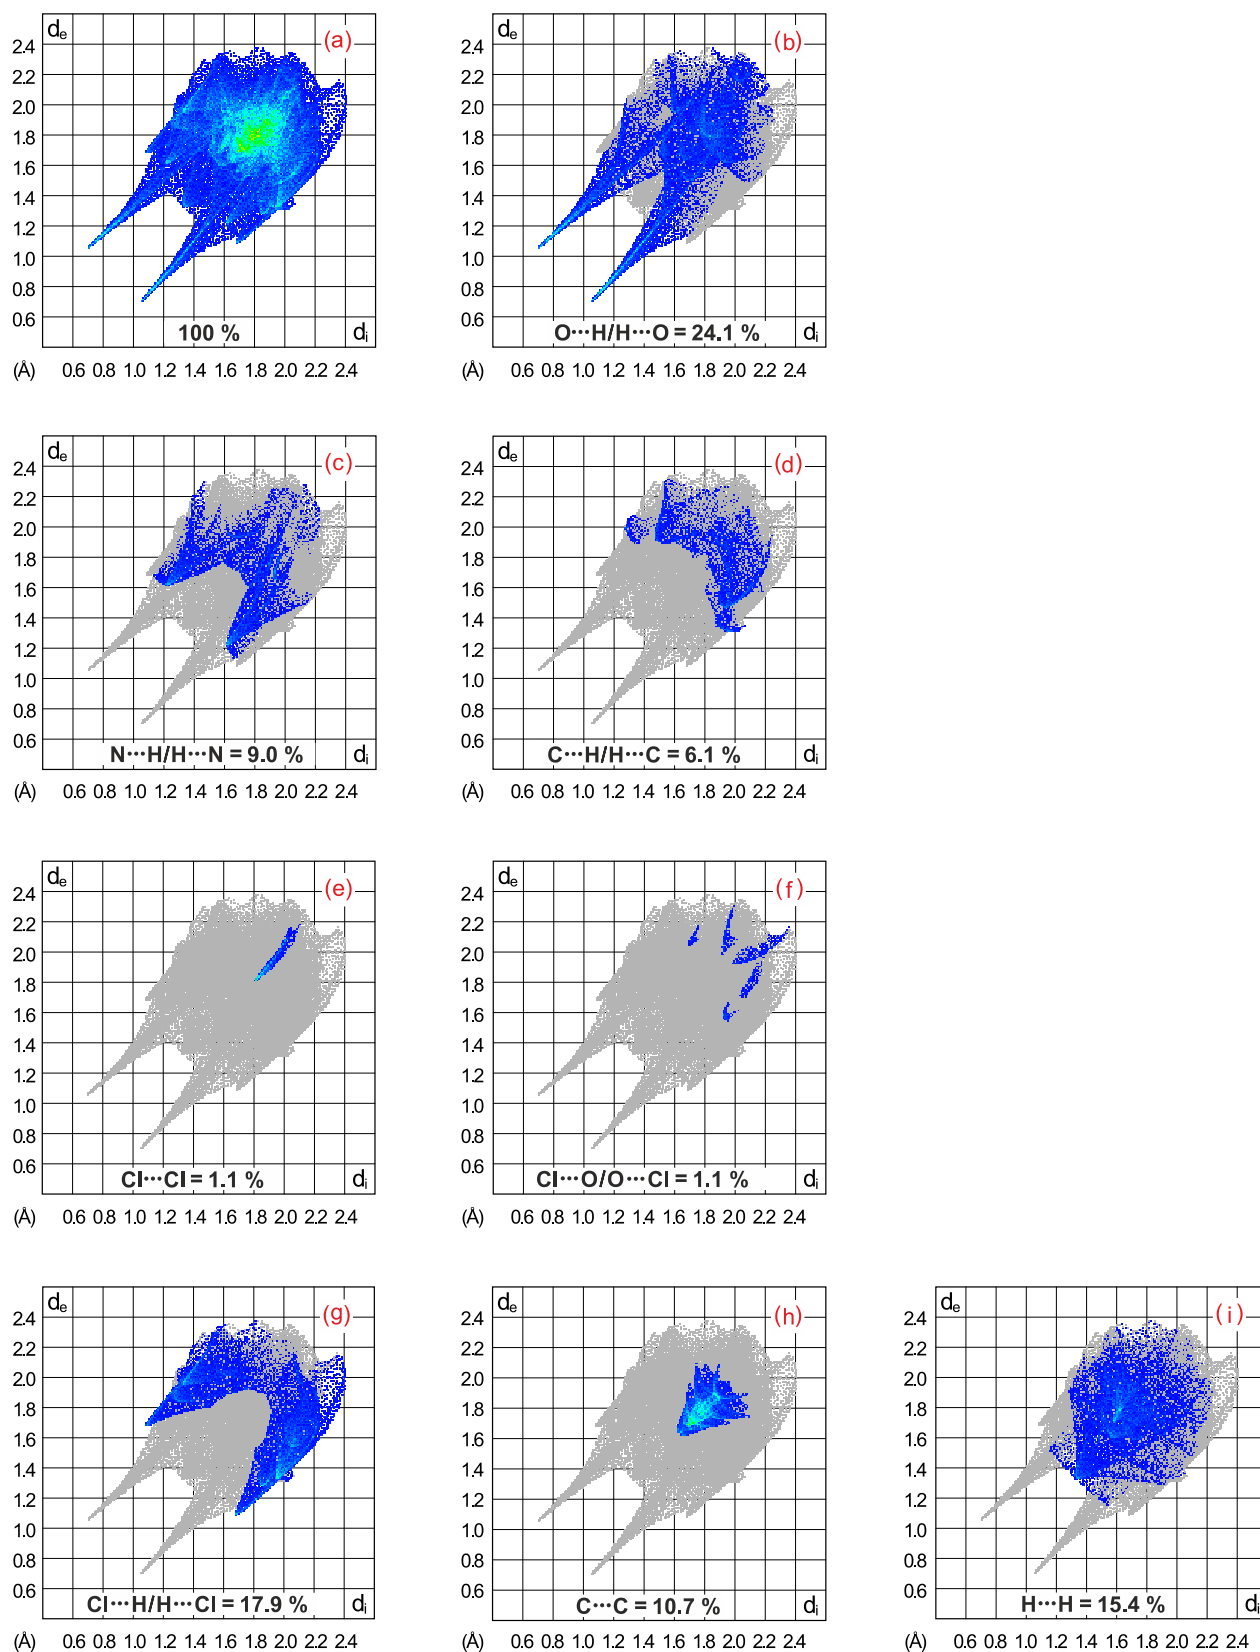

**Figure S4.** 2D fingerprint plots for (a) overall interactions and (b-i) individual interactions in the crystal packing of 2-(I).



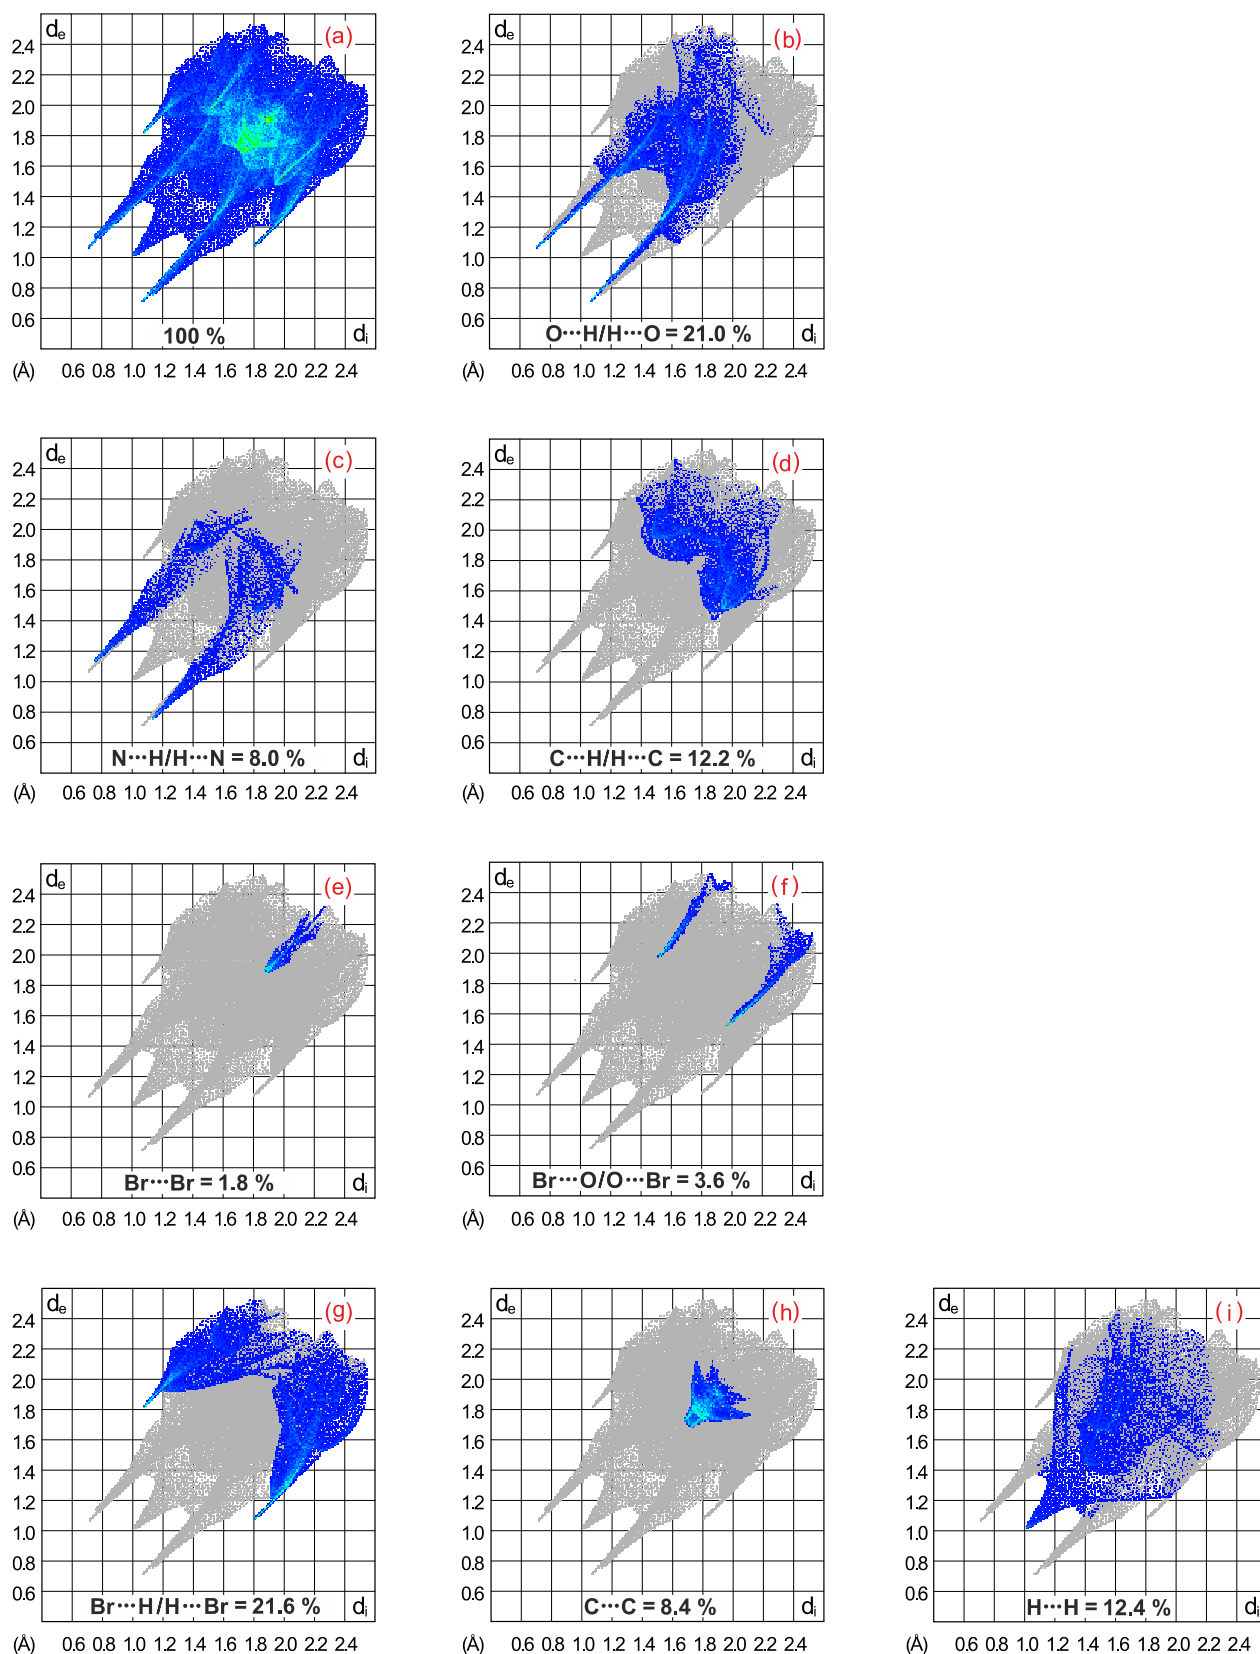

**Figure S5.** 2D fingerprint plots for (a) overall interactions and (b-i) individual interactions in the crystal packing of 3-(I).

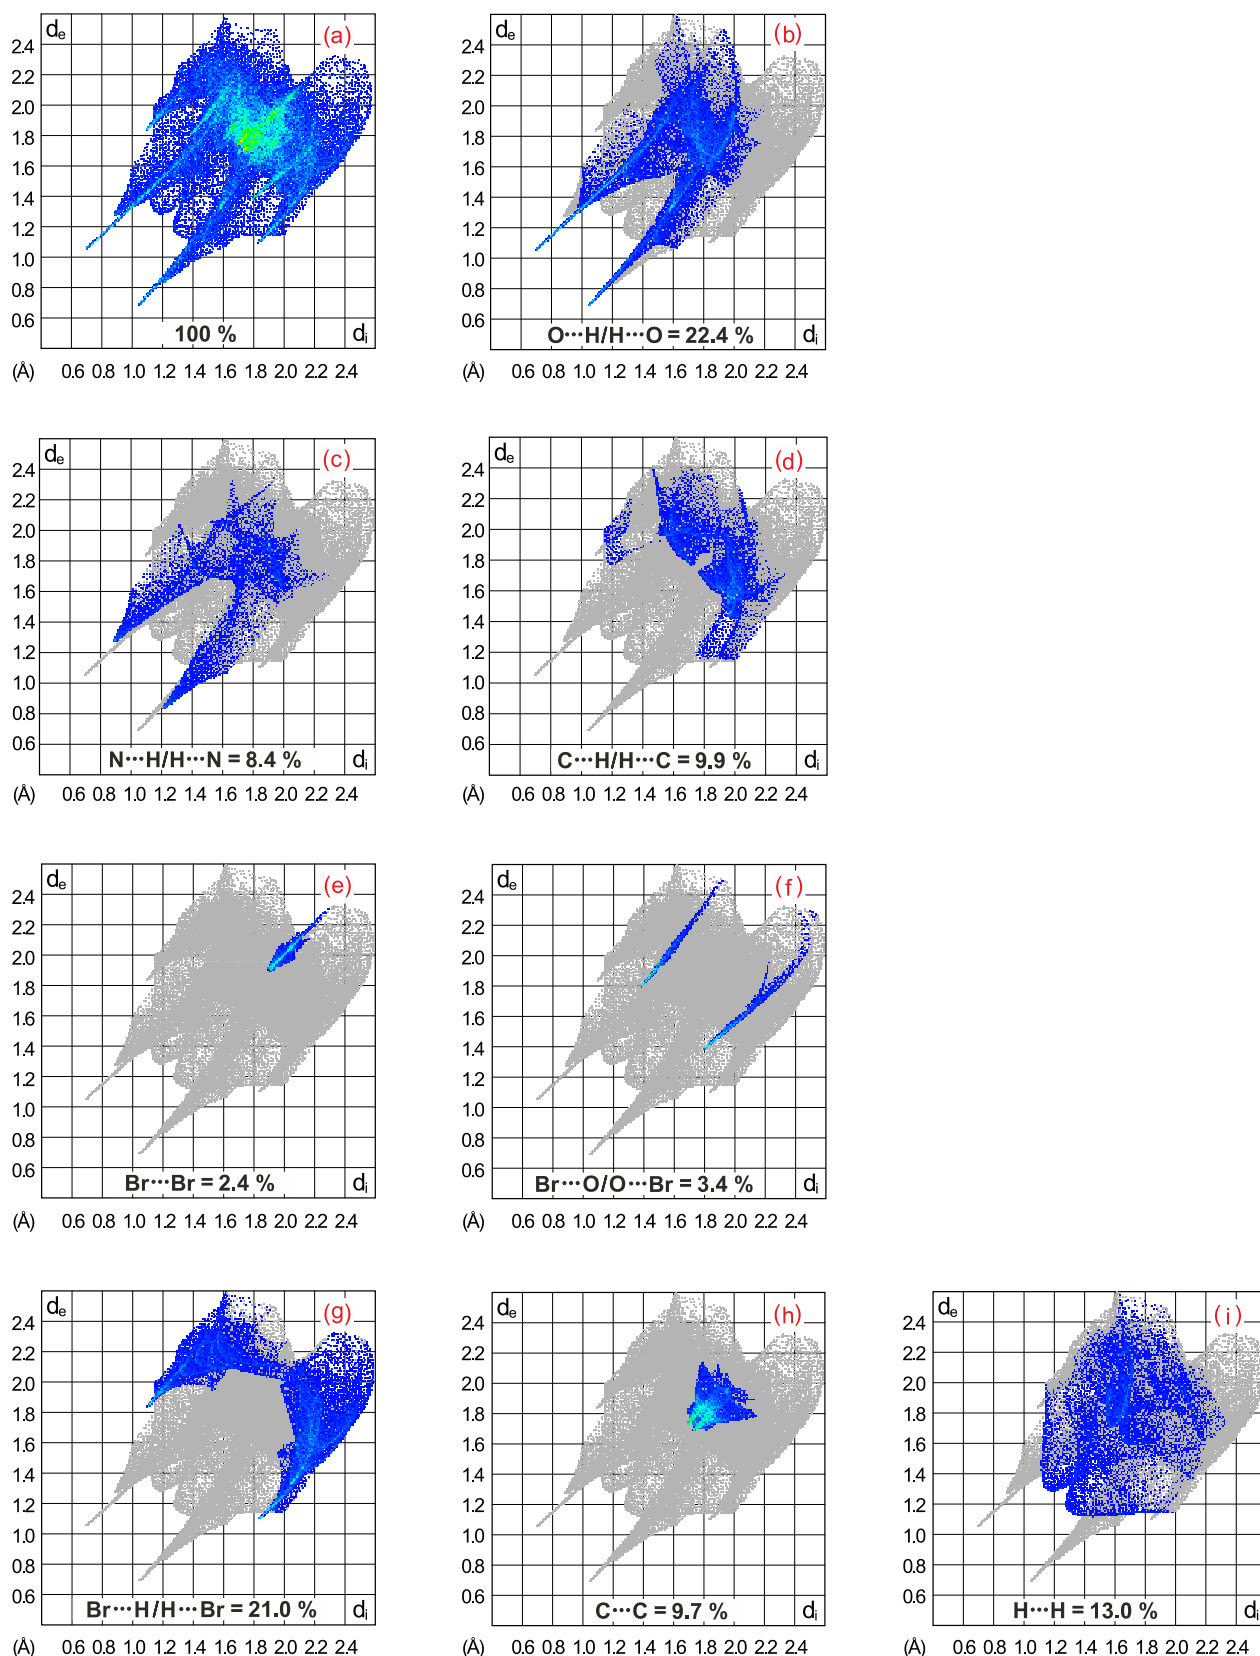

**Figure S6.** 2D fingerprint plots for (a) overall interactions and (b-i) individual interactions in the crystal packing of 3-(II) (molecule A).

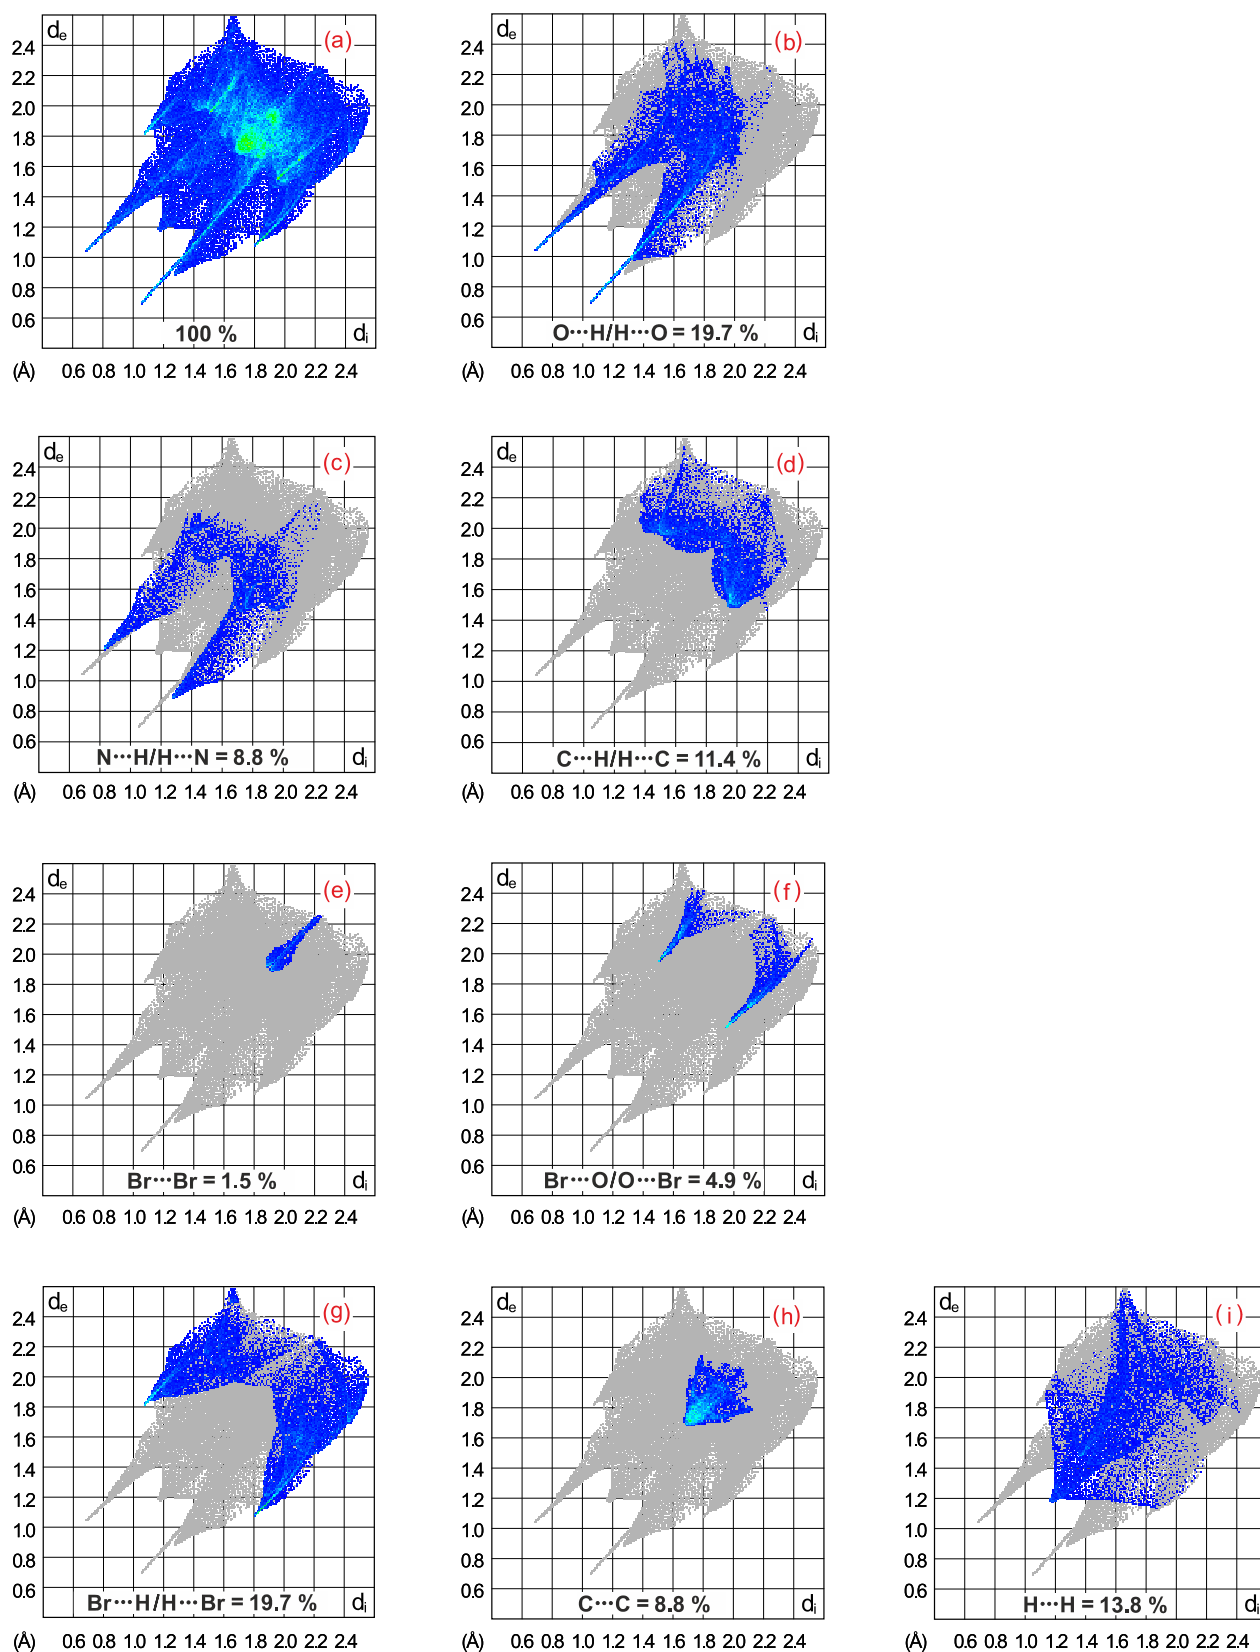

**Figure S7.** 2D fingerprint plots for (a) overall interactions and (b-i) individual interactions in the crystal packing of 3-(II) (molecule B).

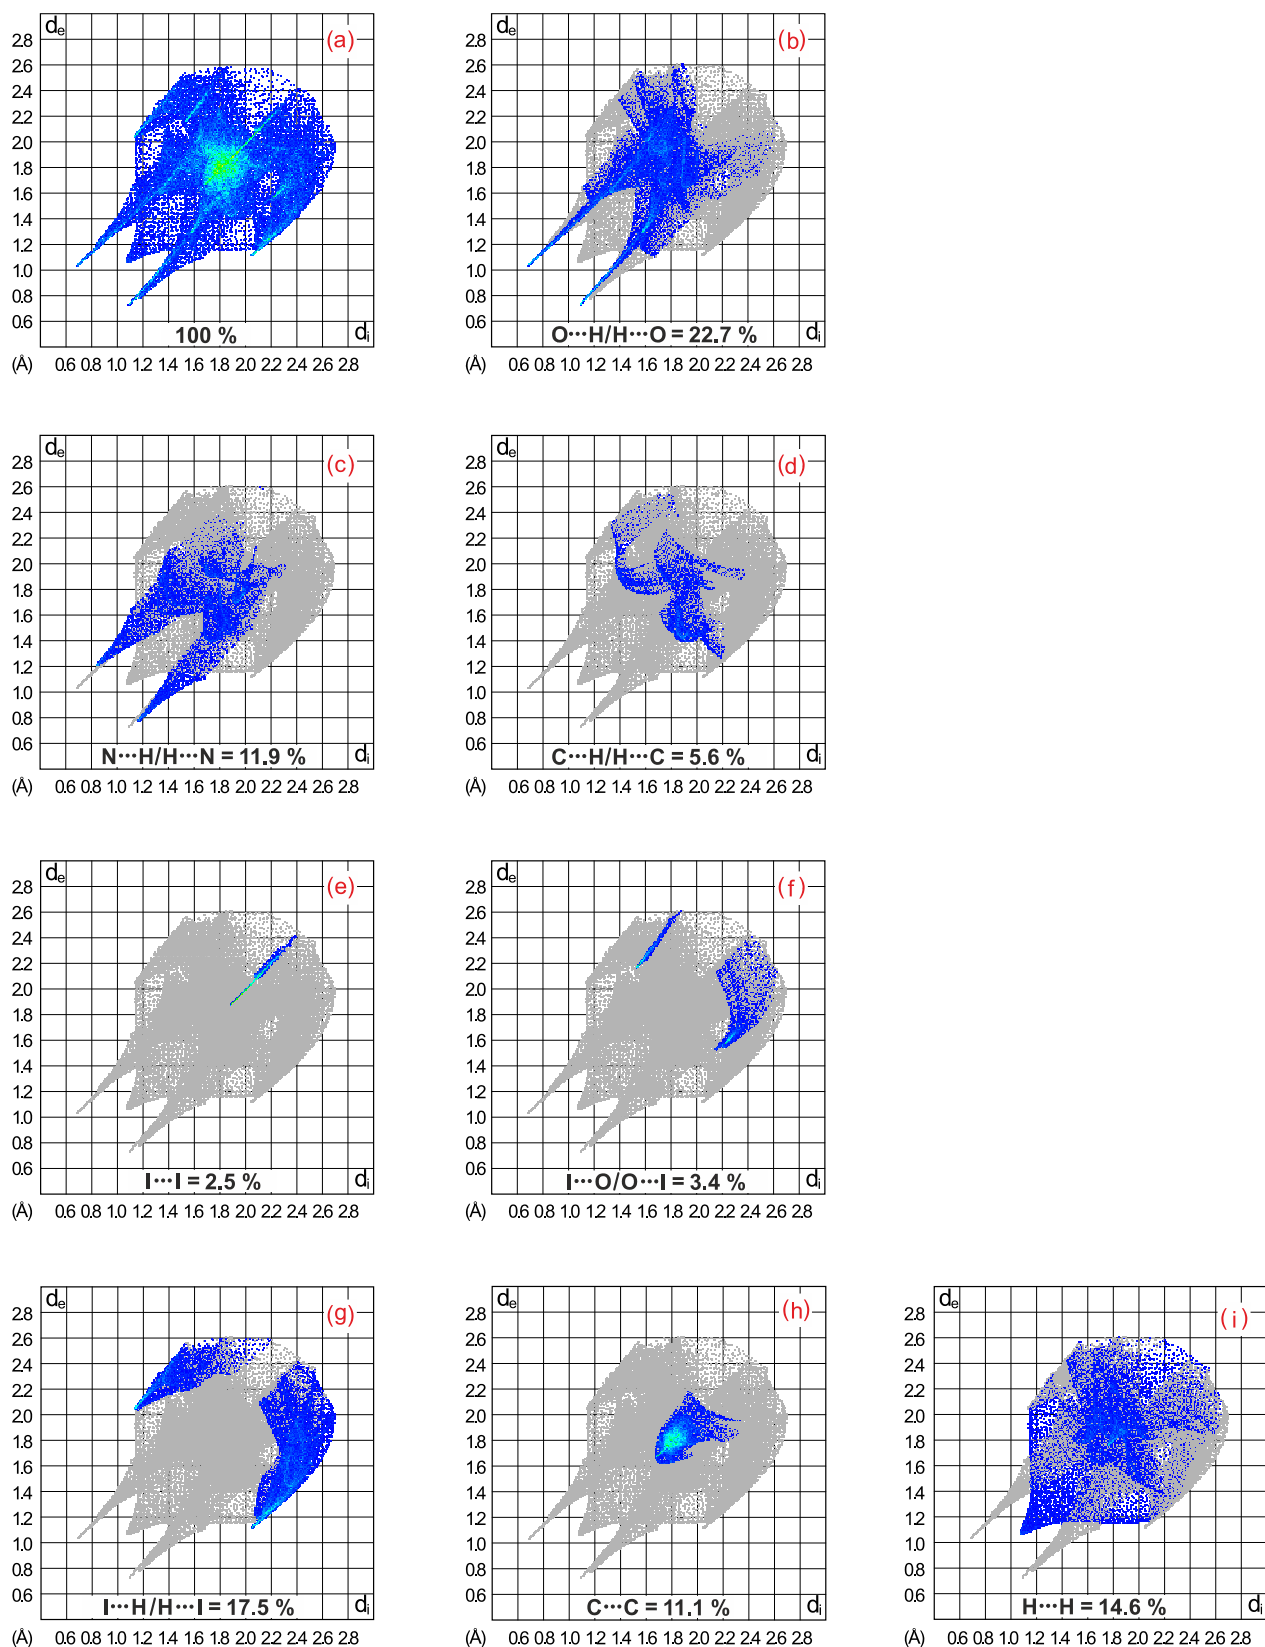

**Figure S8.** 2D fingerprint plots for (a) overall interactions and (b-i) individual interactions in the crystal packing of 4-(I) (molecule A).

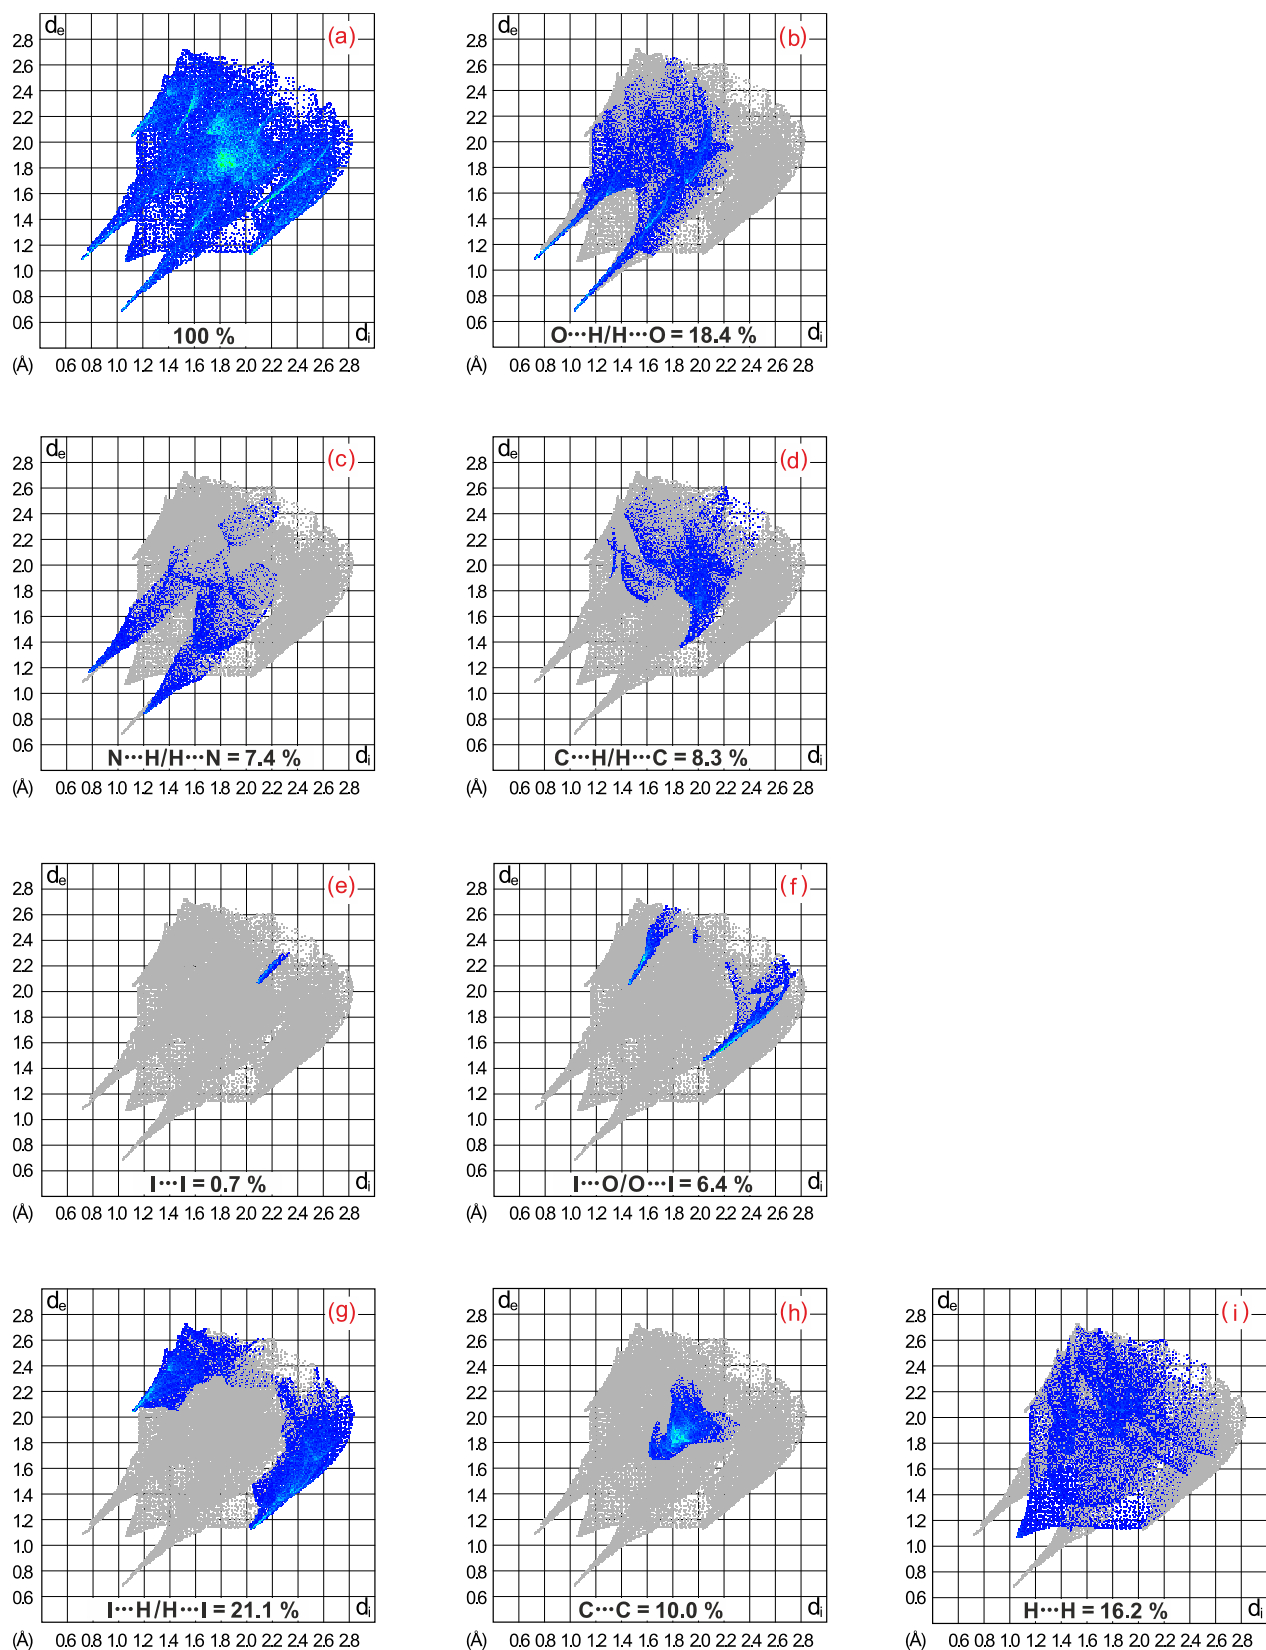

**Figure S9.** 2D fingerprint plots for (a) overall interactions and (b-i) individual interactions in the crystal packing of 4-(I) (molecule B).

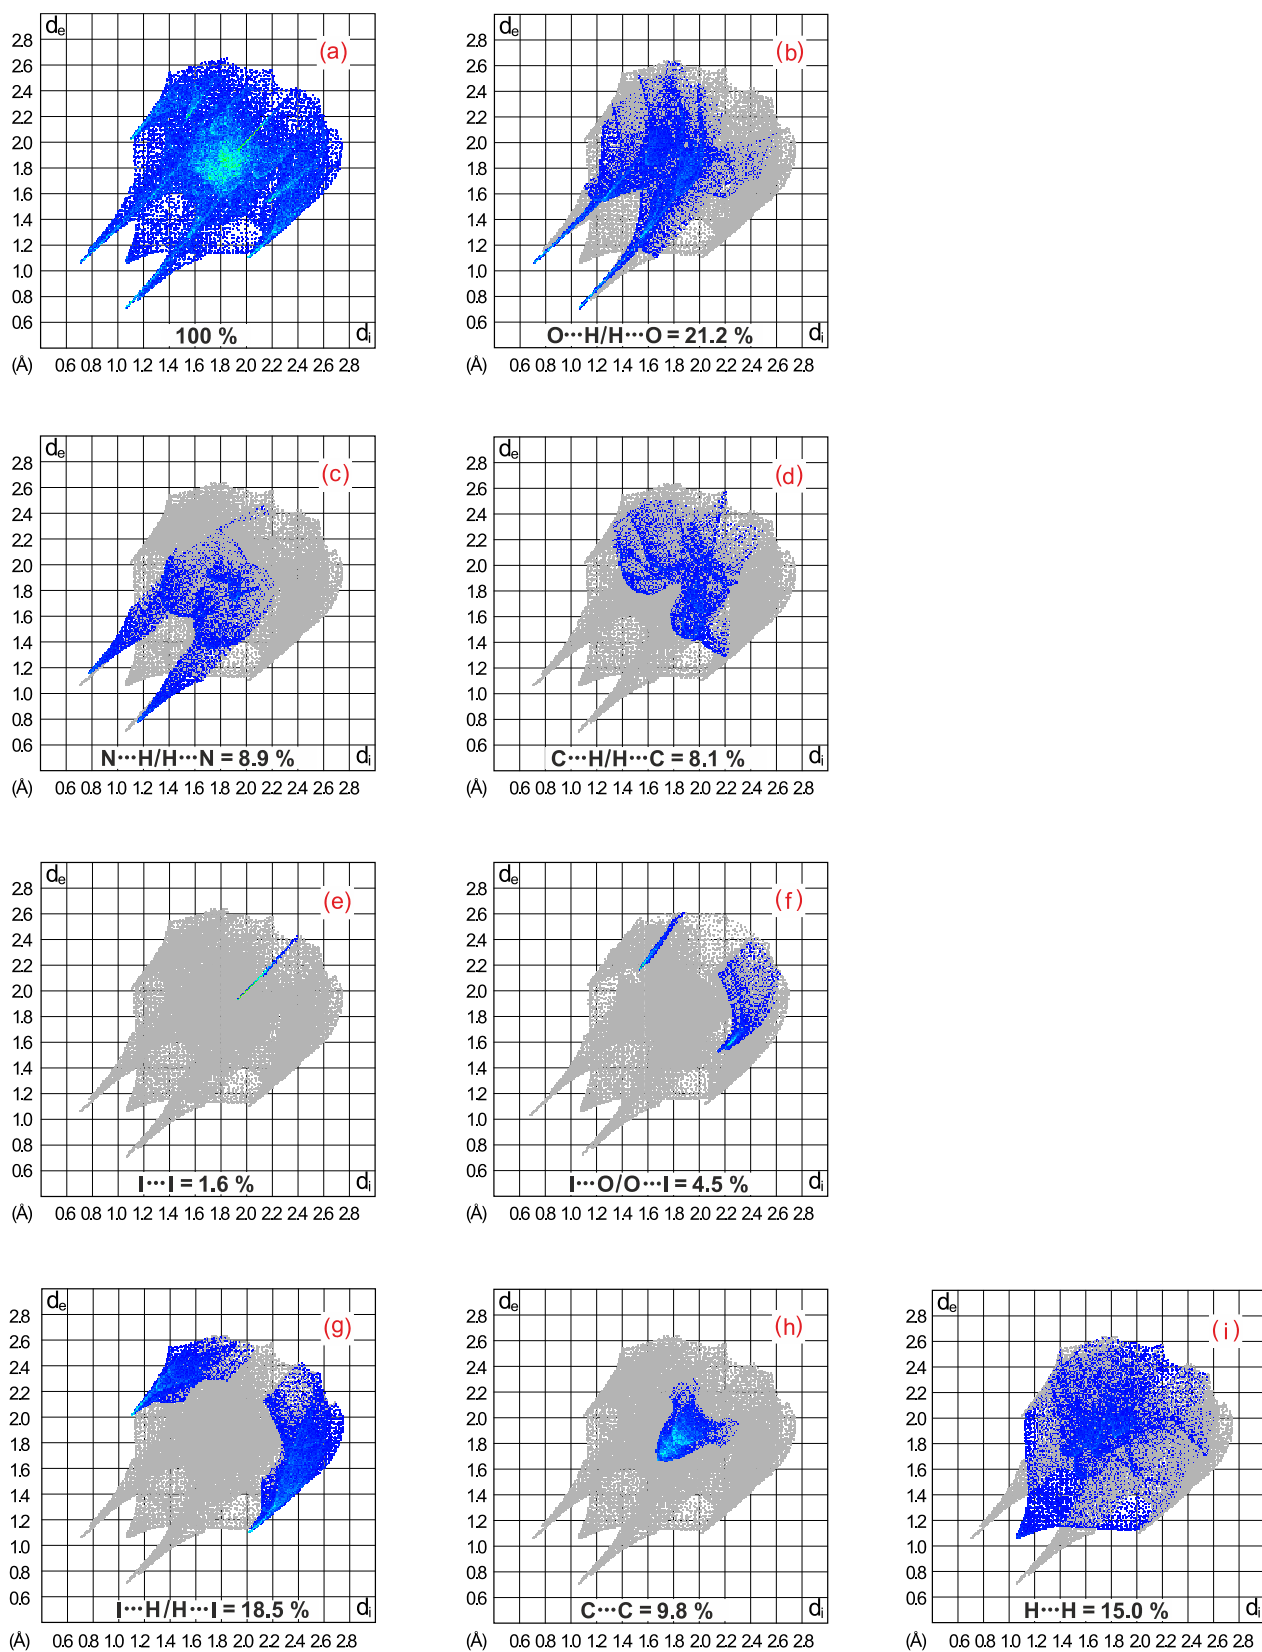

**Figure S10.** 2D fingerprint plots for (a) overall interactions and (b-i) individual interactions in the crystal packing of 4-(II).

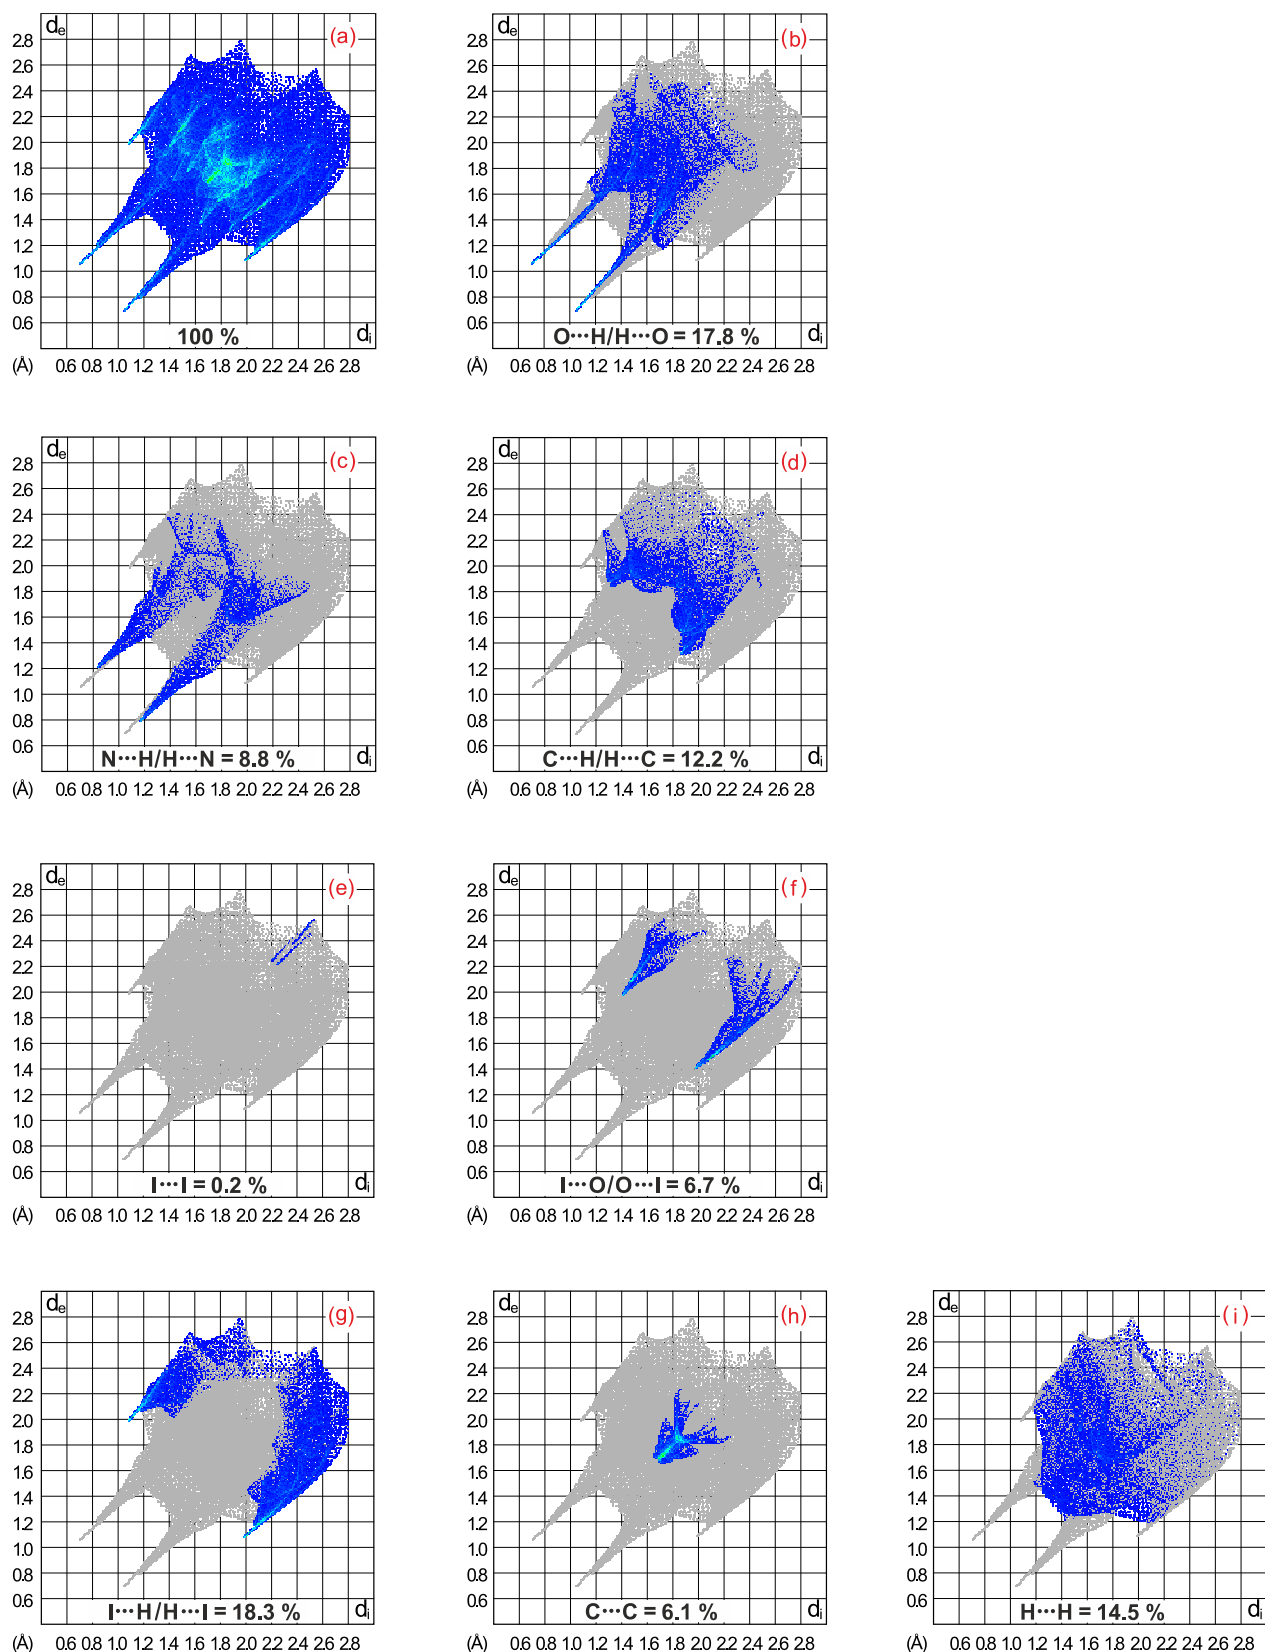

**Figure S11.** 2D fingerprint plots for (a) overall interactions and (b-i) individual interactions in the crystal packing of 4-(III) (molecule A).

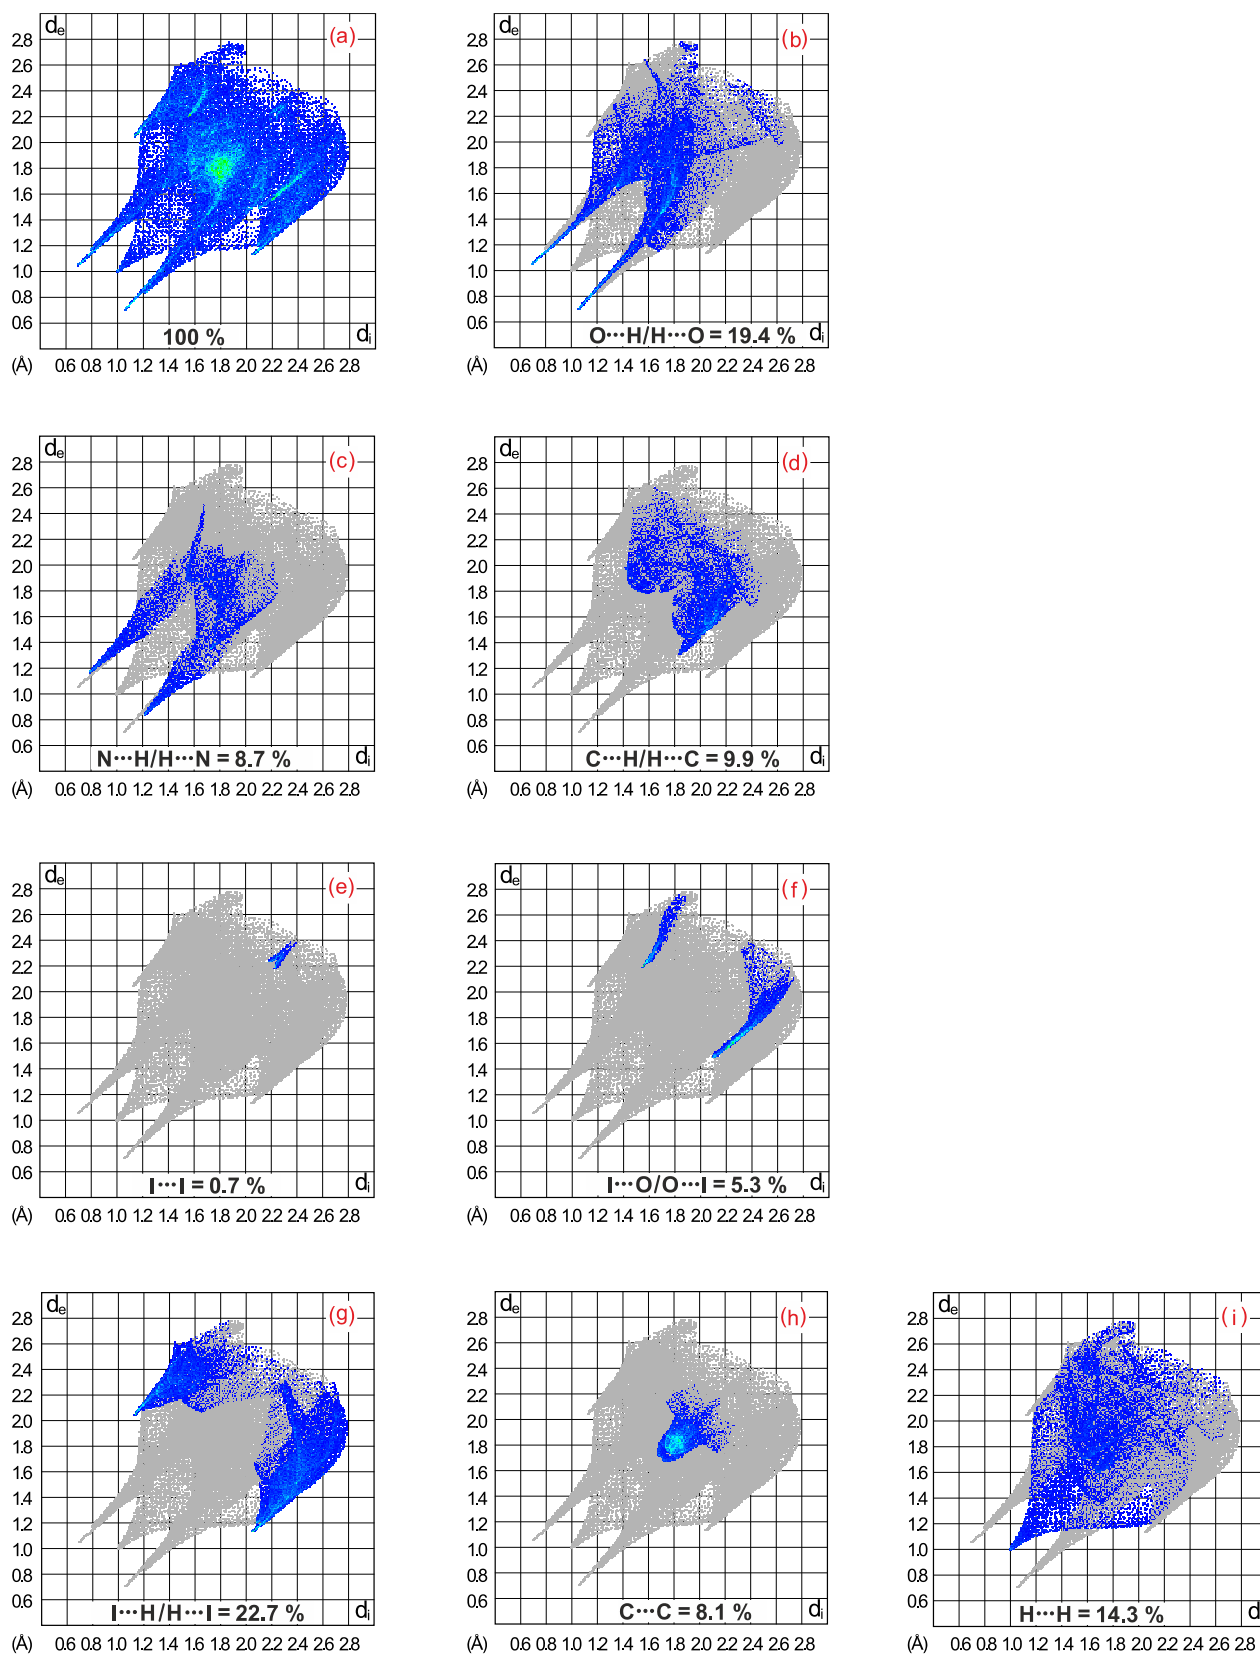

**Figure S12.** 2D fingerprint plots for (a) overall interactions and (b-i) individual interactions in the crystal packing of 4-(III) (molecule B).



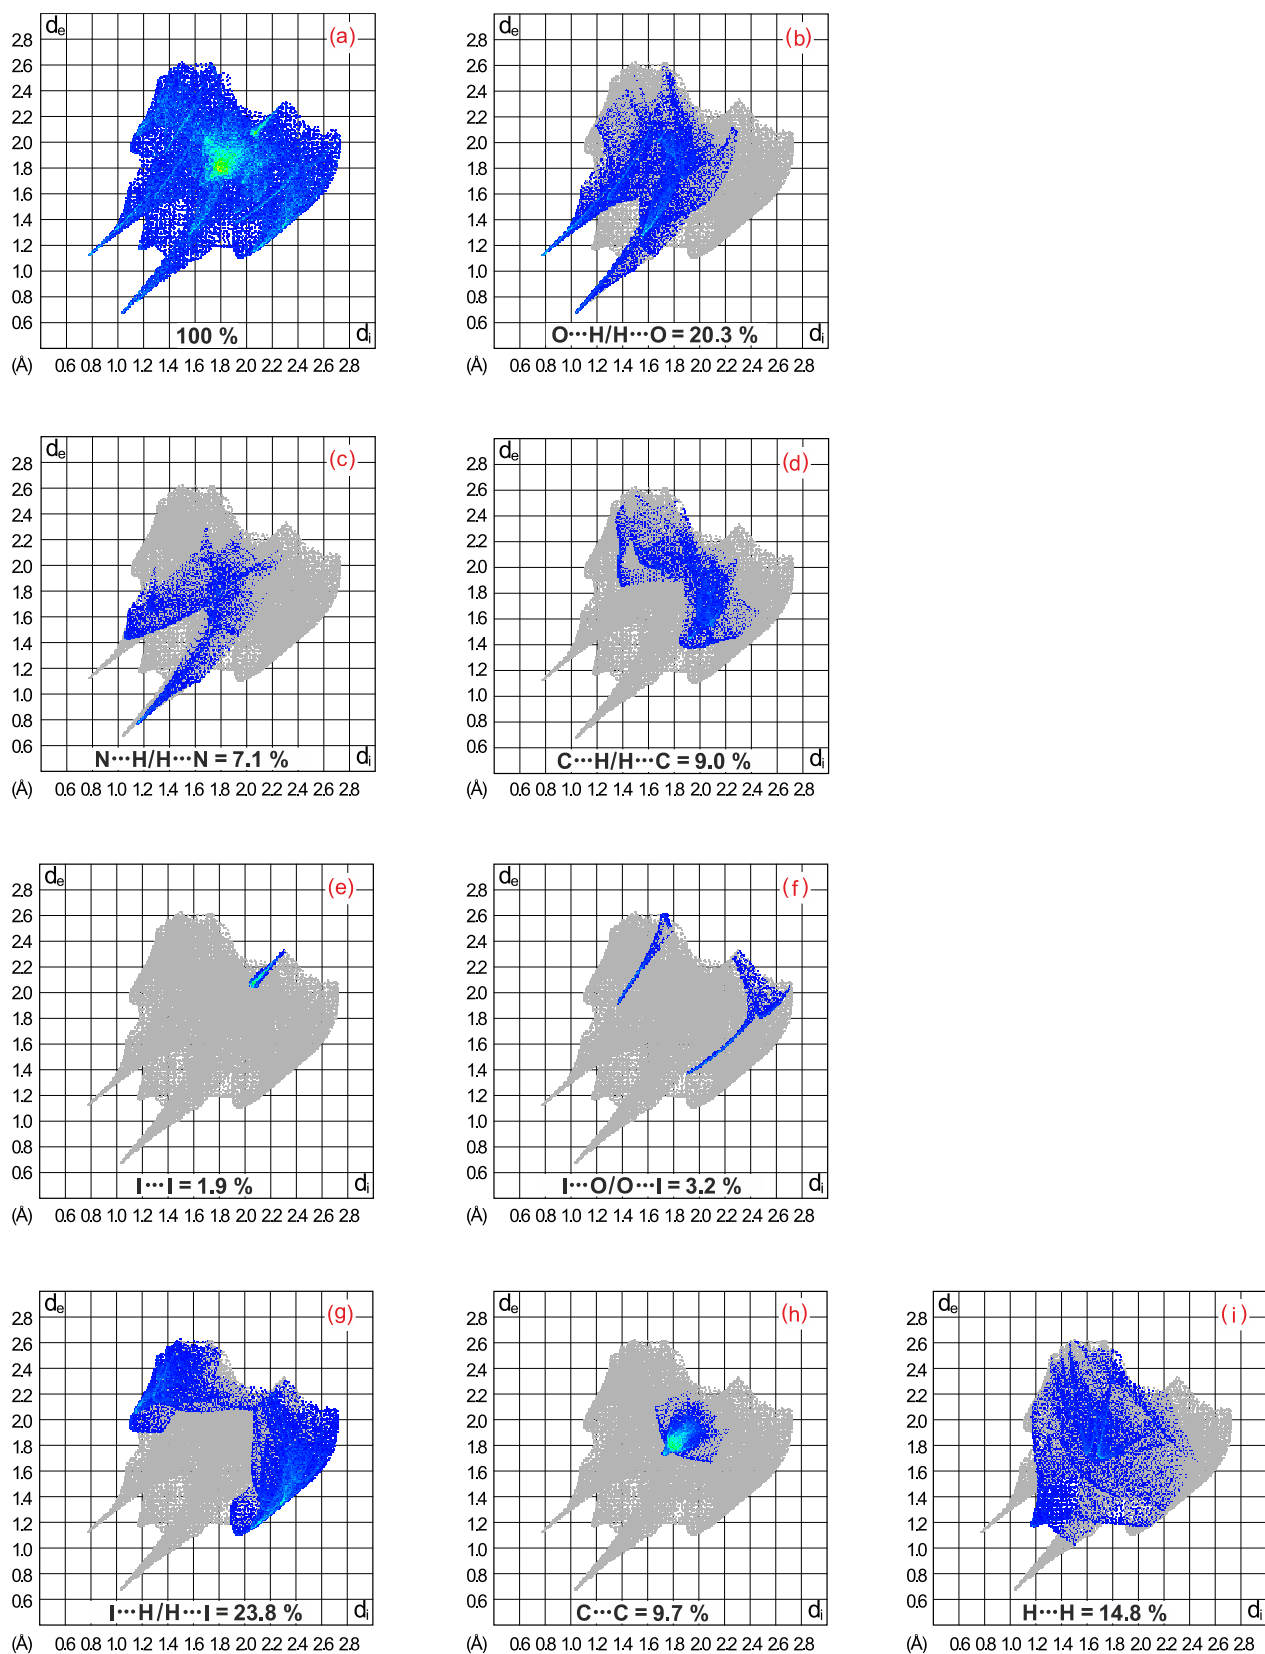

**Figure S13.** 2D fingerprint plots for (a) overall interactions and (b-i) individual interactions in the crystal packing of 4-(IV) (molecule A).

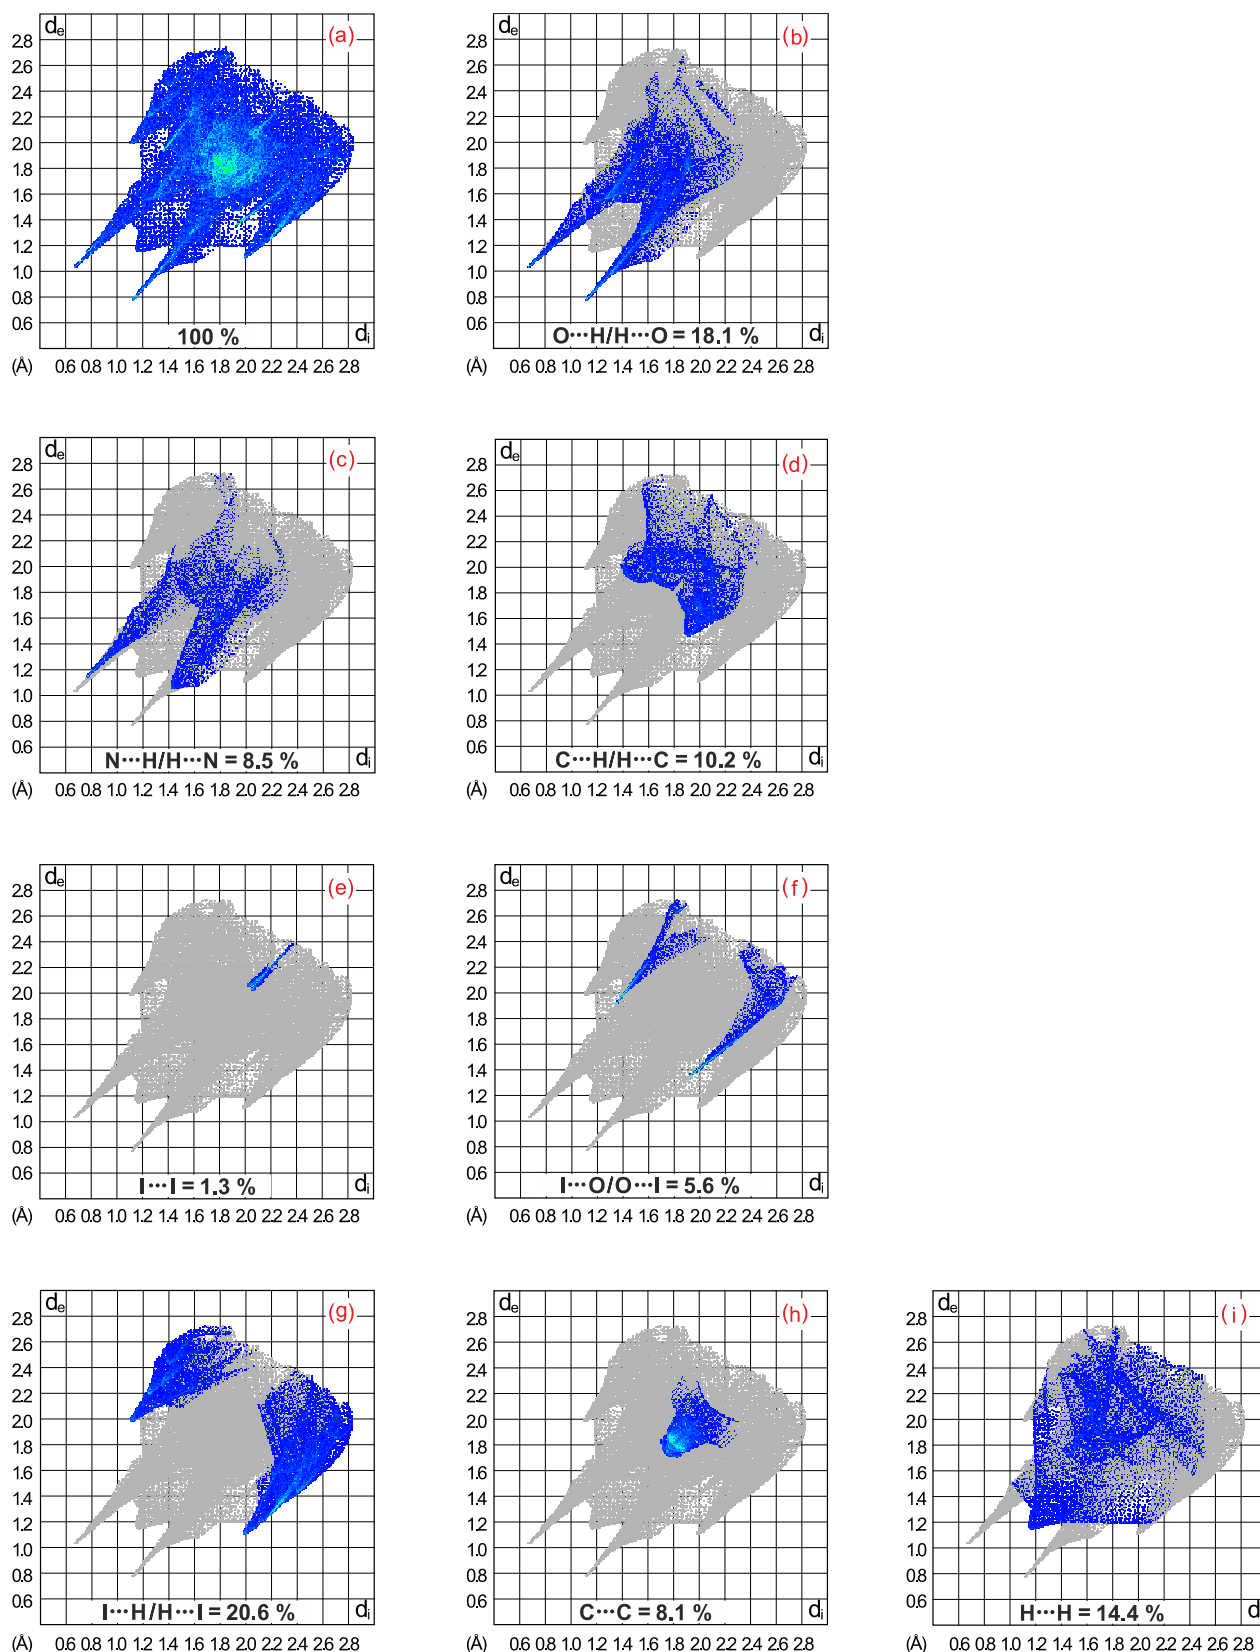

**Figure S14.** 2D fingerprint plots for (a) overall interactions and (b-i) individual interactions in the crystal packing of 4-(IV) (molecule B).

## Hirshfeld surface plots of the crystal phases of compounds 3 and 4 (Figures S15-S20)

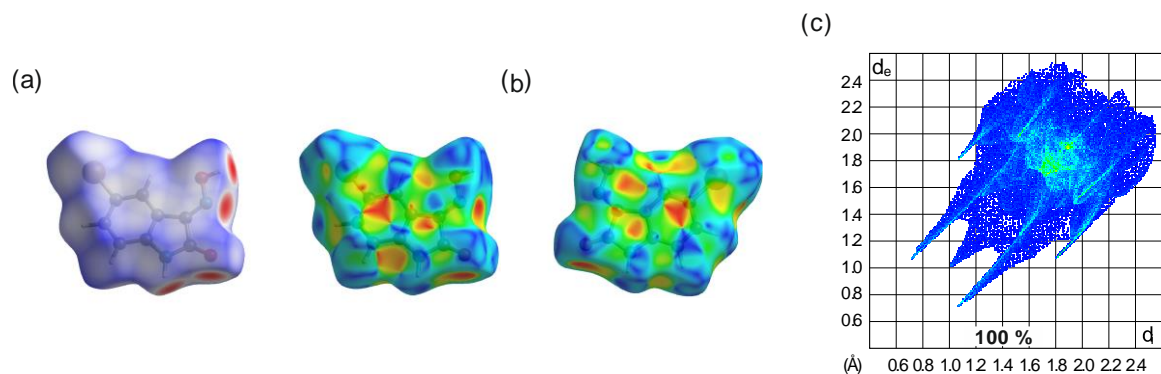

**Figure S15.** 3D Hirshfeld surface plot of 3-I mapped over  $d_{\text{norm}}$  (a), HS mapped over the shape index (b) and 2D fingerprint for overall interactions for 3-I (c).

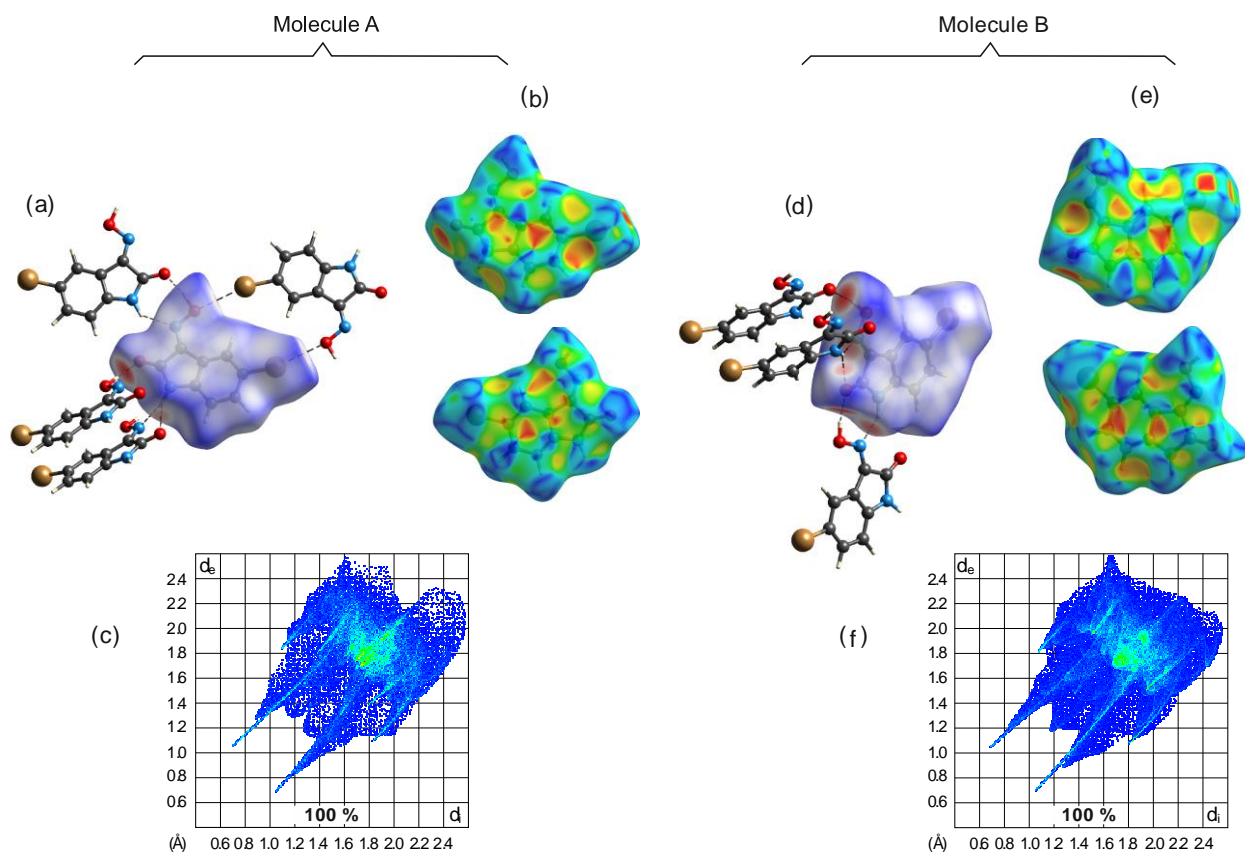

**Figure S16.**  $d_{\text{norm}}$ , selected intermolecular contacts, shape index (front and back side) and 2D fingerprint for overall interactions for molecule A (a-c) and molecule B (d-f) of 3-II).

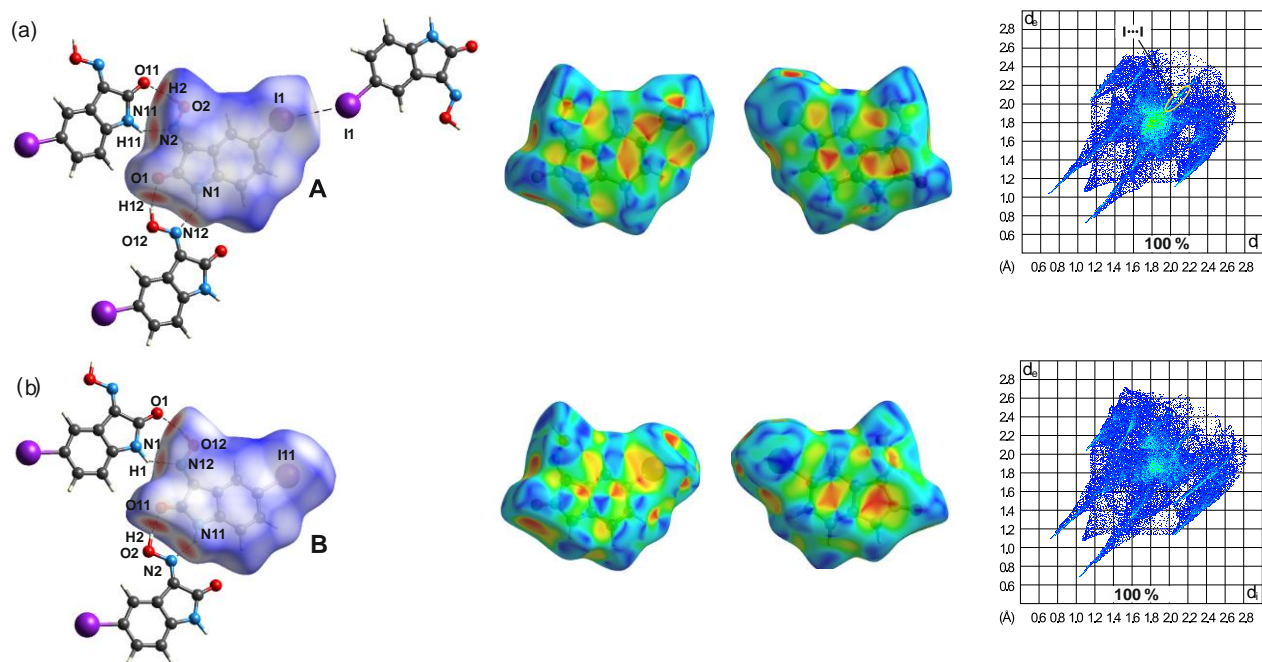

**Figure S17.**  $d_{\text{norm}}$ , selected intermolecular contacts, shape index (front and back side) and 2D fingerprint for overall interactions for molecule A (a-c) and molecule B (d-f) of 4-(I).

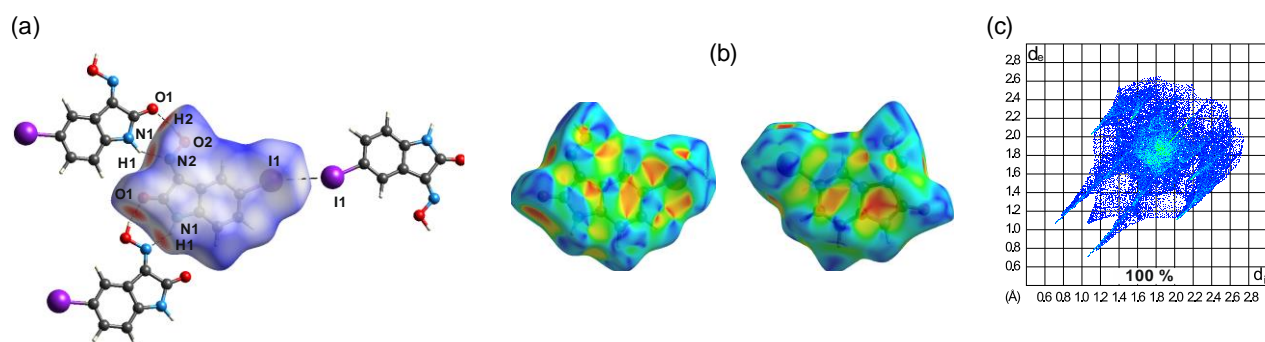

**Figure S18.** (a)  $d_{\text{norm}}$ , selected intermolecular contacts, (b) shape index (front and back side) and (c) 2D fingerprint for overall interactions of 4-(II).

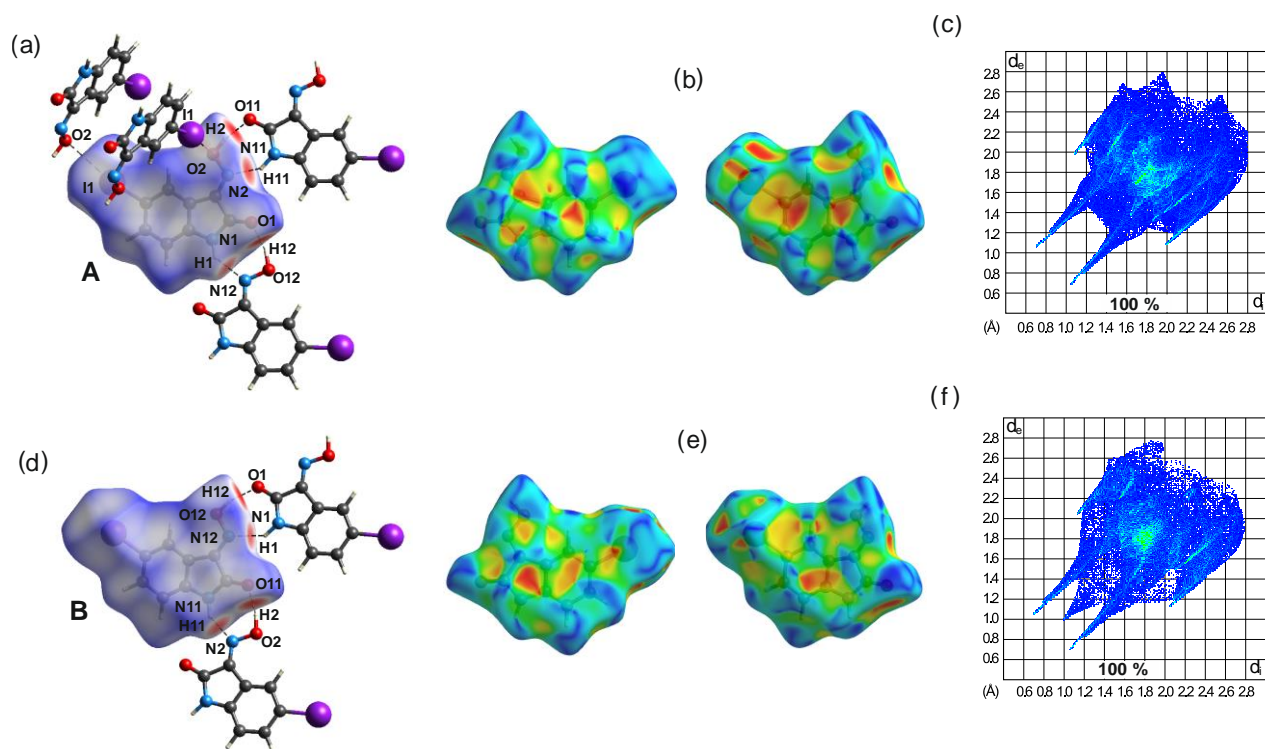

**Figure S19.**  $d_{\text{norm}}$ , selected intermolecular contacts, shape index (front and back side) and 2D fingerprint for overall interactions for molecule A (a-c) and molecule B (d-f) of 4-(III).

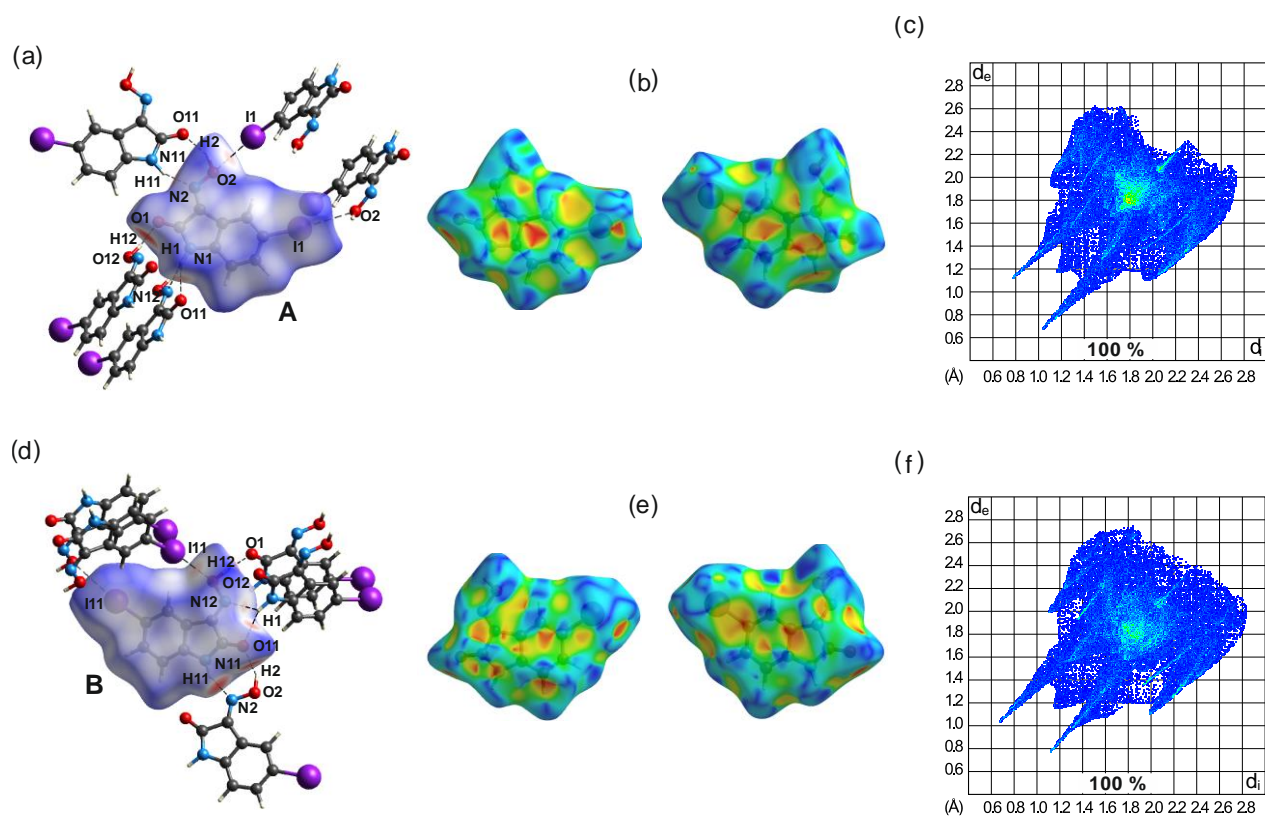

**Figure S20.**  $d_{\text{norm}}$ , selected intermolecular contacts, shape index (front and back side) and 2D fingerprint for overall interactions for molecule A (a-c) and molecule B (d-f) of 4-(IV).

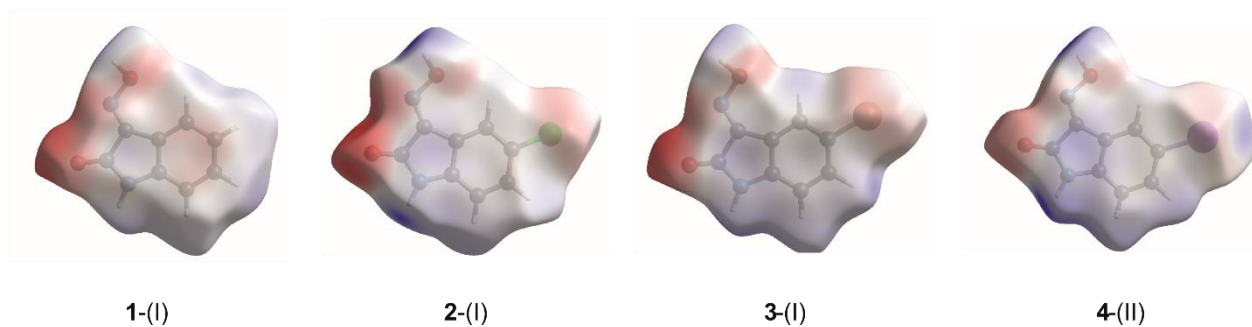

**Figure S21.** Calculated electrostatic potential for compounds **1** – **4** mapped on the respective Hirshfeld surfaces (blue = positive, red = negative).



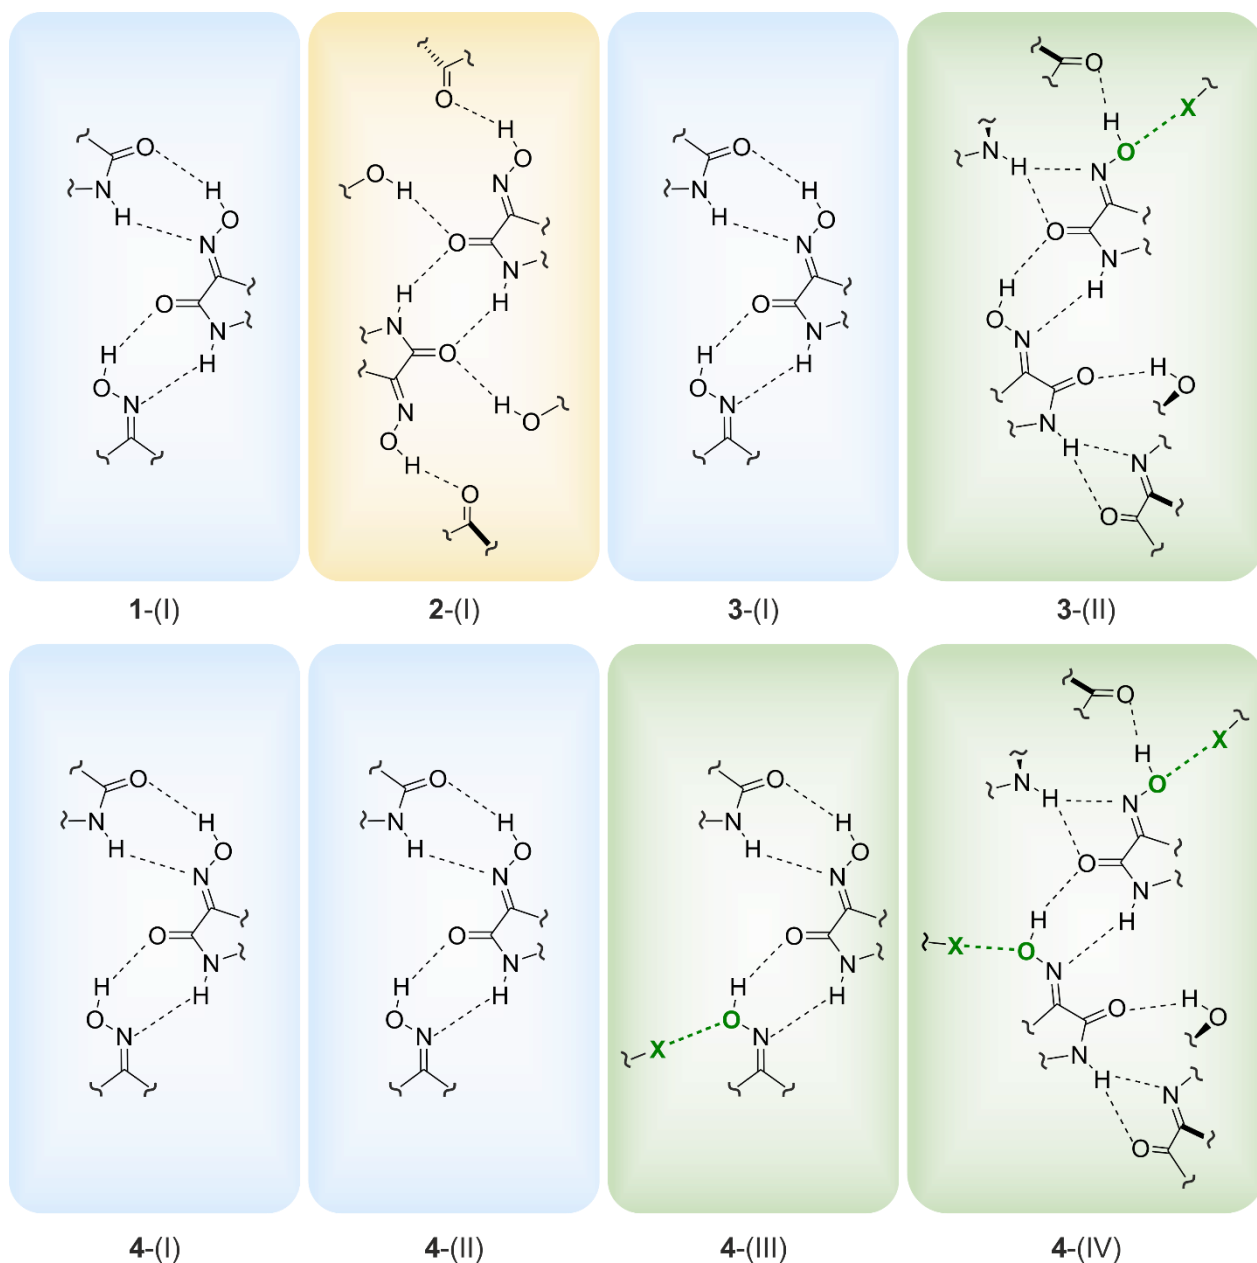

**Figure S22.** Overview of hydrogen and halogen bonding patterns in the crystal structures **1-(I)**, **2-(I)**, **3-(I)**, **3-(II)** and **4-(I) – 4-(IV)**. The coloring highlights the main supramolecular motifs:  $R_2^2(7)$  hydrogen bonding pattern (blue),  $R_2^2(8)$  hydrogen bonding pattern (yellow) or  $R_2^2(7)$  hydrogen bonding pattern in combination with  $X \cdots O_{\text{oxime}}$  halogen bonds (green).

**$^1\text{H}$ - and  $^{13}\text{C}$ -NMR spectra of compounds 1-4 (Figures S23-S30)**

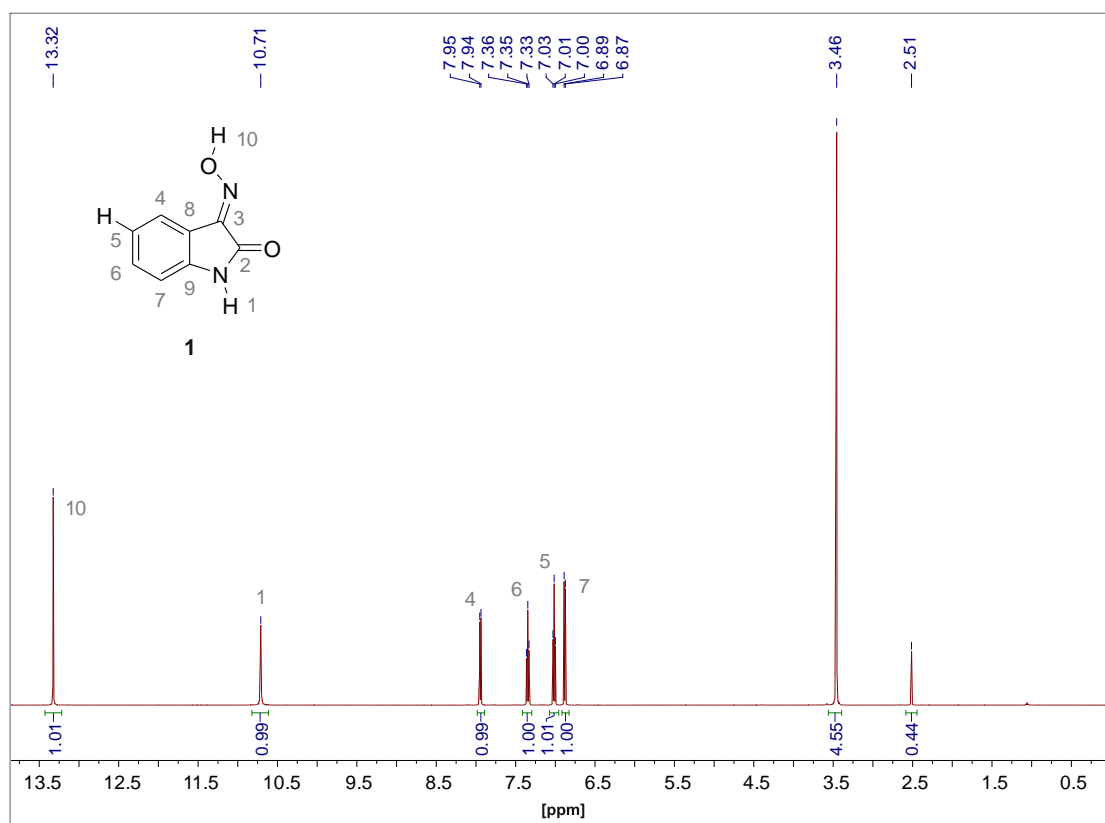

**Figure S23.**  $^1\text{H}$ -NMR spectrum (500 MHz) of compound **1** in  $\text{DMSO-d}_6$ .

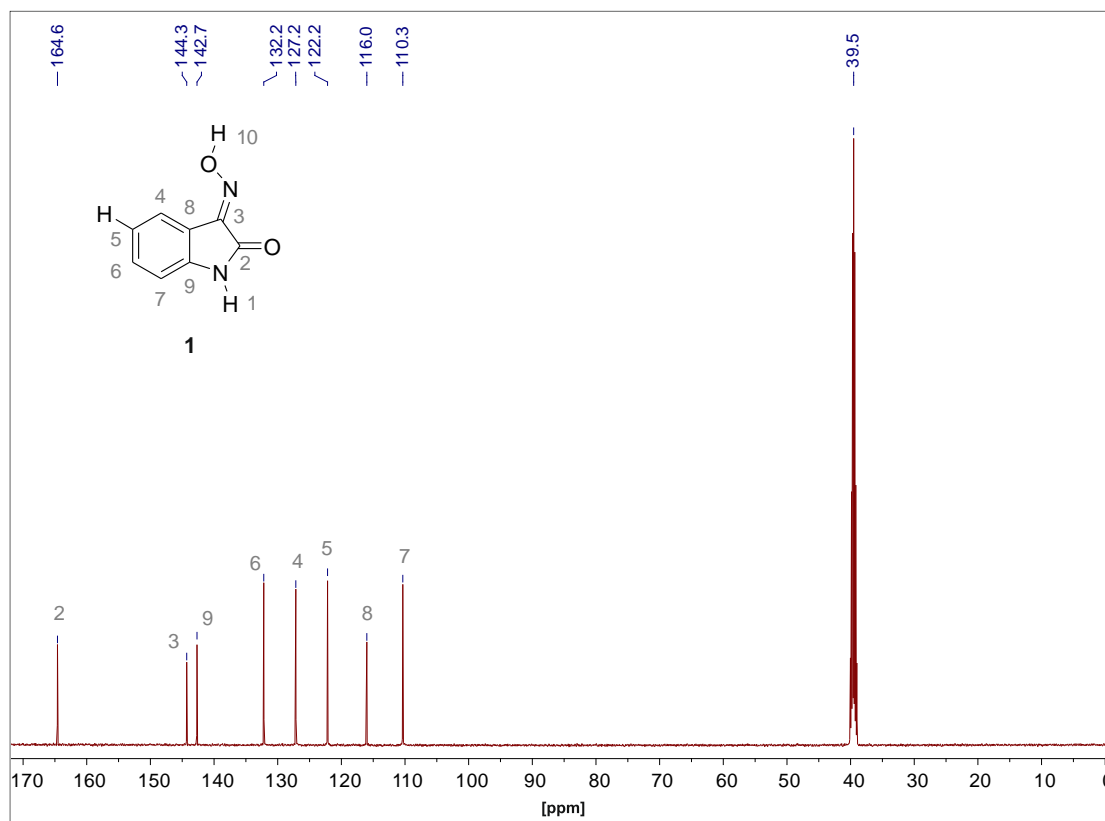

**Figure S24.**  $^{13}\text{C}$ -NMR spectrum (125 MHz) of compound **1** in  $\text{DMSO-d}_6$ .



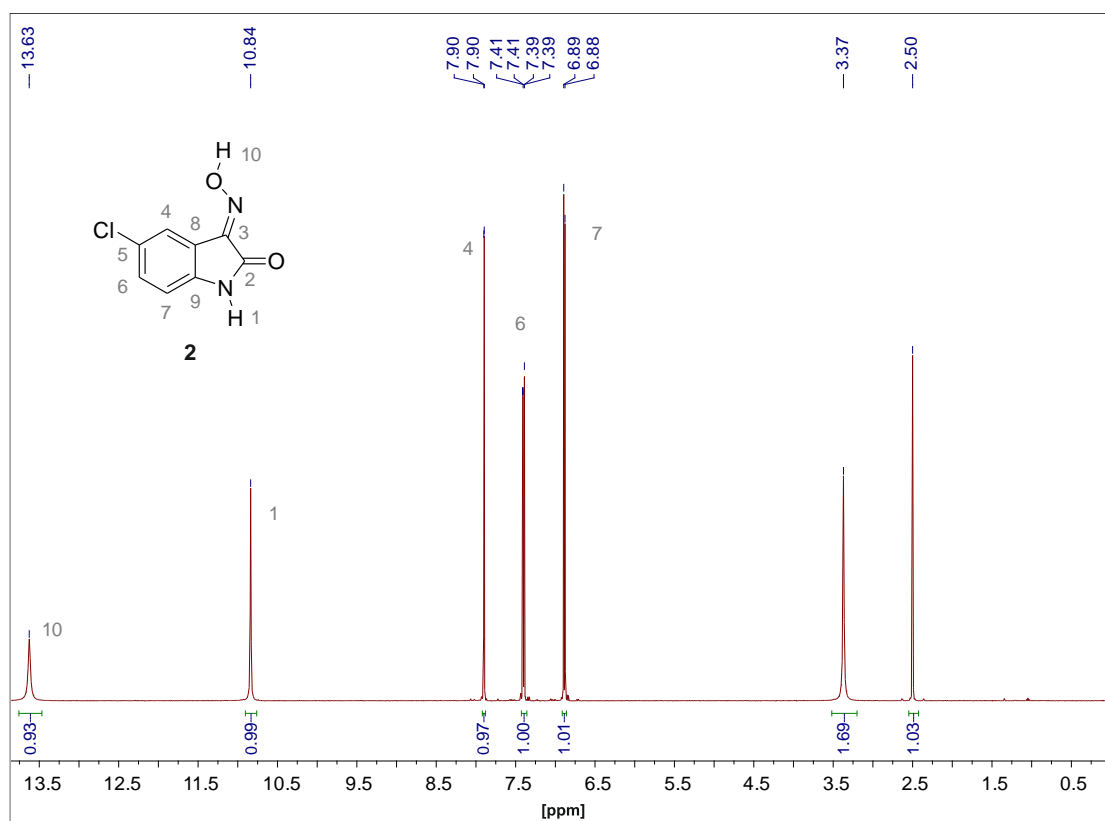

**Figure S25.**  $^1\text{H}$ -NMR spectrum (500 MHz) of compound **2** in  $\text{DMSO-d}_6$ .

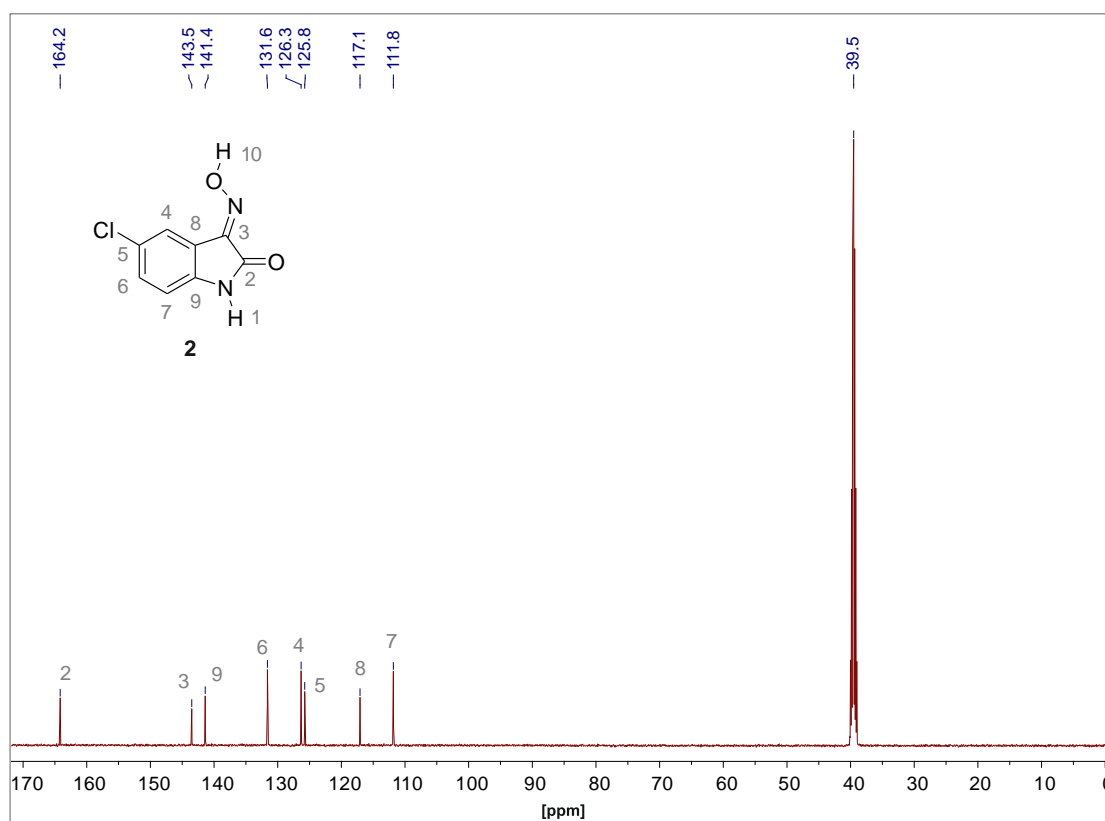

**Figure S26.**  $^{13}\text{C}$ -NMR spectrum (125 MHz) of compound **2** in  $\text{DMSO-d}_6$ .

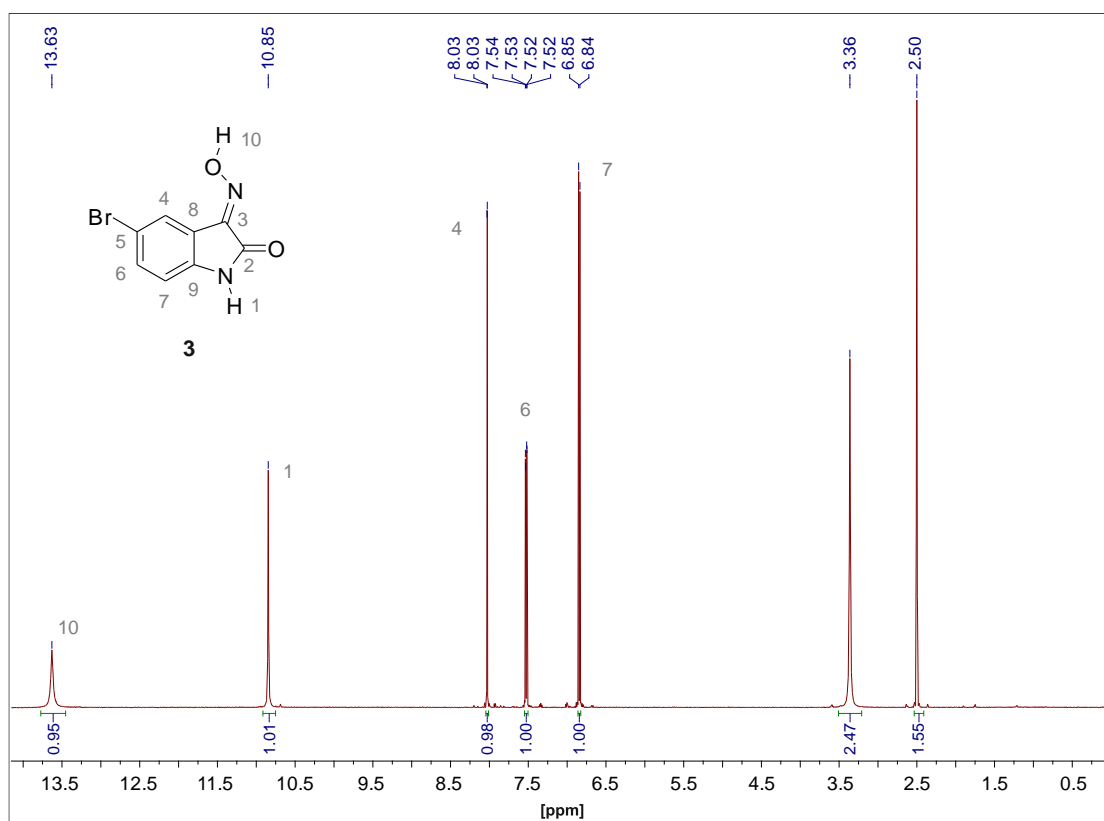

**Figure S27.**  $^1\text{H}$ -NMR (500 MHz) spectrum of compound **3** in  $\text{DMSO-d}_6$ .

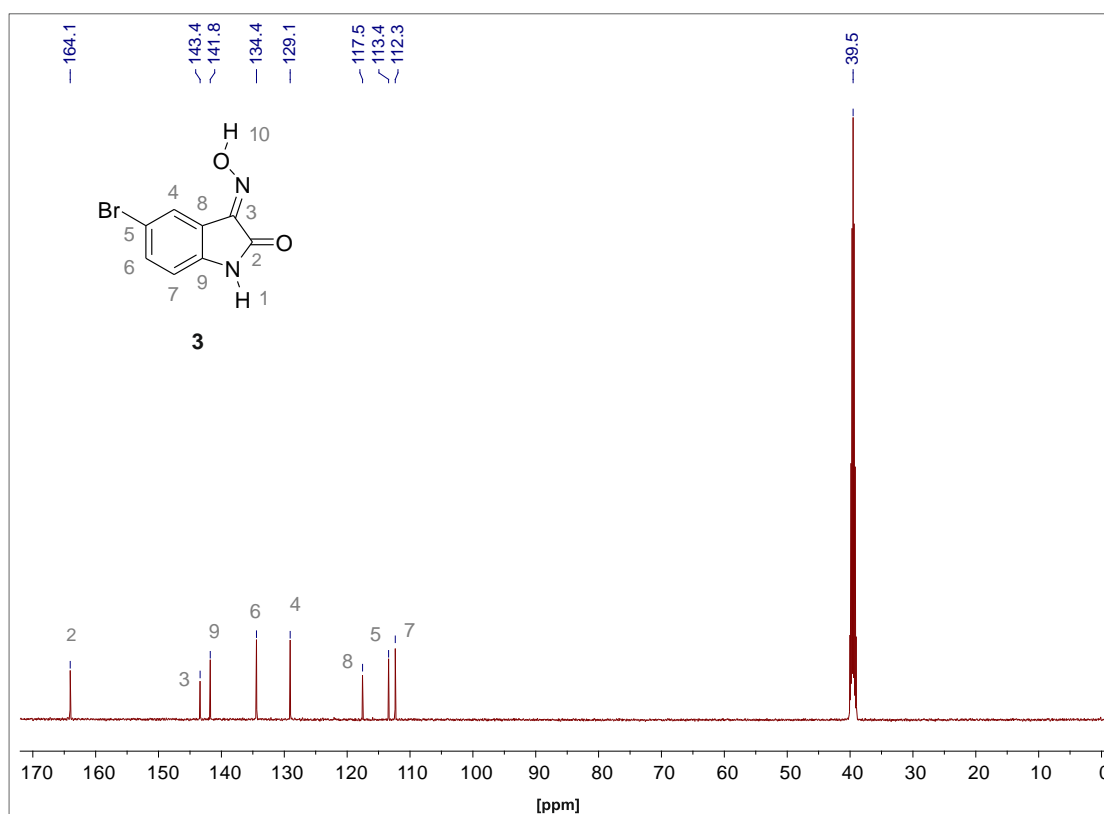

**Figure S28.**  $^{13}\text{C}$ -NMR (125 MHz) spectrum of compound **3** in  $\text{DMSO-d}_6$ .

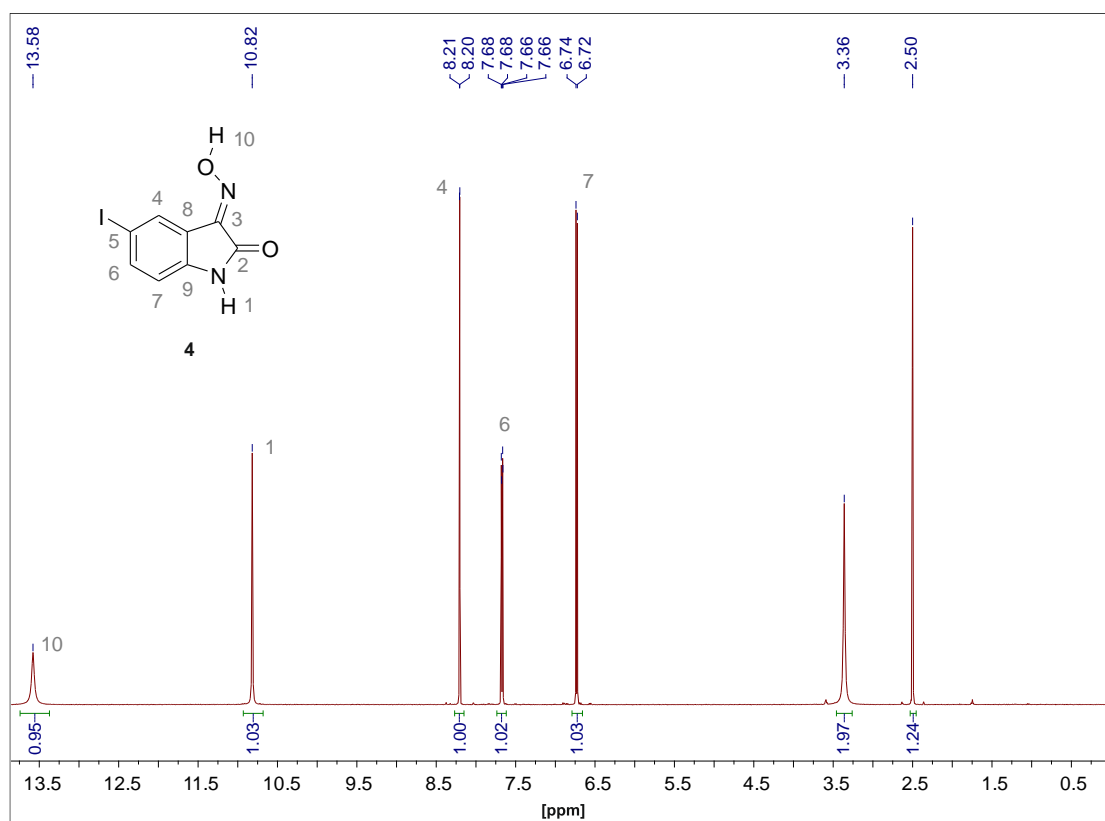

**Figure S29.**  $^1\text{H}$ -NMR spectrum (500 MHz) of compound **4** in  $\text{DMSO-d}_6$ .

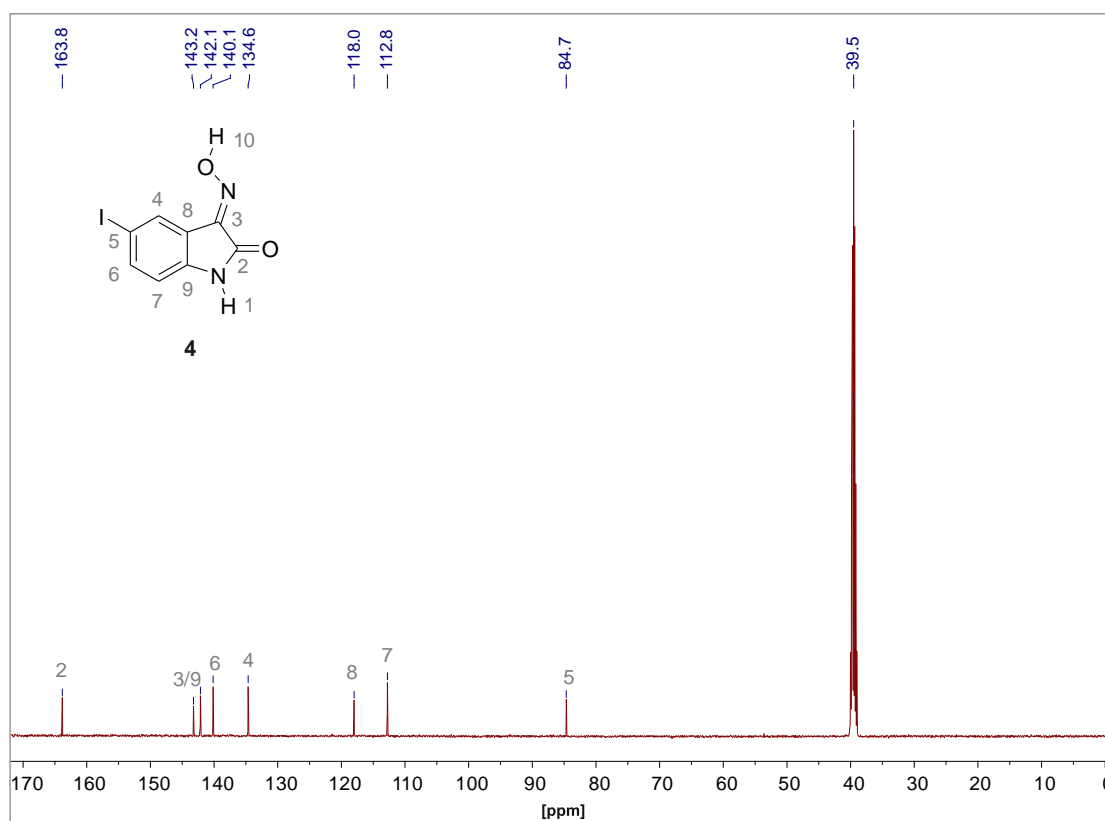

**Figure S30.**  $^{13}\text{C}$ -NMR spectrum (125 MHz) of compound **4** in  $\text{DMSO-d}_6$ .

### Synthetic procedures for 1-3 (further details)

*Synthesis of 1H-isatin-3-oxime (1):* Isatin (0.77 g, 5.23 mmol) and potassium carbonate (0.72 g, 5.21 mmol) were dissolved in a boiling mixture of ethanol (50 mL) and water (15 mL) and a solution of hydroxylamine hydrochloride (0.55 g, 7.85 mmol) in water (15 mL) was added. The mixture was refluxed for 6 h and stirred at room temperature for 14 h, during which time another portion of hydroxylamine hydrochloride (0.15 g, 2.09 mmol) was added. Afterward the solution's volume was reduced to about 10 mL by evaporation of the solvents and the precipitating solid was filtered off, washed with water and chloroform, recrystallized from water/ethanol (4:1 v/v) and dried *in vacuo* to obtain **1** as a bright yellow solid. Yield: 0.62 g (3.82 mmol, 74 %).

*Synthesis of 5-chloroisatin-3-oxime (2):* 5-Chloroisatin (0.70 g, 3.86 mmol) was dissolved in a boiling mixture of ethanol (40 mL) and tetrahydrofuran (5 mL). Afterwards, a solution of potassium carbonate (0.53 g, 3.86 mmol) and hydroxylamine hydrochloride (0.40 g, 5.78 mmol) in water (15 mL) was added. After refluxing for 5 h and diluting with water (20 mL), the precipitating solid was filtered off, washed with water, recrystallized from ethanol and dried *in vacuo* to obtain **2** as a yellow solid. Yield: 0.52 g (2.64 mmol, 69 %).

*Synthesis of 5-bromoisatin-3-oxime (3):* 5-Bromoisatin (0.50 g, 2.22 mmol) was dissolved in a mixture of ethanol (40 mL) and tetrahydrofuran (20 mL). Then a solution of potassium carbonate (0.26 g, 1.88 mmol) and hydroxylamine hydrochloride (0.23 g, 3.31 mmol) in water (20 mL) was added and the mixture stirred at room temperature for 1 d, during which time another portion of hydroxylamine hydrochloride (0.05 g, 0.72 mmol) was added. Thereafter the solution's volume was reduced to 20 mL via evaporation of the solvents and the precipitating solid filtered off. A second batch of solid was obtained by diluting the mother liquor with water, combined with the first batch, washed with water, recrystallized from water/tetrahydrofuran (1:1 v/v) and dried *in vacuo* to yield **3** as a yellow solid. Yield: 0.30 g (1.25 mmol, 56 %).

## References

1. Sheldrick, G. M. Crystal structure refinement with SHELXL, *Acta Crystallogr. C* **2015**, *71*, 3–8, doi:10.1107/S2053229614024218.
2. X-Area, version 1.75; Software package for data collection and data evaluation; Stoe & Cie: Darmstadt, **2015**.
3. LANA, version 1.63.1; Laue Analyzer; Stoe & Cie: Darmstadt, **2015**.
4. Spek, A.L. checkCIF validation ALERTS: what they mean and how to respond, *Acta Crystallogr. E* **2020**, *76*, 1–11, doi:10.1107/S2056989019016244.
5. Golushko, A.A.; Sandzhieva, M.A.; Ivanov, A.Y.; Boyarskaya, I.A.; Khoroshilova, O.V.; Barkov, A.Y.; Vasilyev, A.V. Reactions of 3,3,3-Trihalogeno-1-Nitropropenes with Arenes in the Superacid CF<sub>3</sub>SO<sub>3</sub>H: Synthesis of (Z)-3,3,3-Trihalogeno-1,2-diarylpropan-1-one Oximes and Study on the Reaction Mechanism. *J. Org. Chem.* **2018**, *83*, 10142–10157, doi:10.1021/acs.joc.8b01406.
6. Campbell, A.; Tasker, P.; Parsons, S. CCDC 1413226: Experimental Crystal Structure Determination, **2015**, doi:10.5517/cc1jfkgy.
